# Behavioral estimates of mating success corroborate genetic evidence for pre-copulatory sexual selection in male *Anolis sagrei* lizards

Rachana S. Bhave<sup>1</sup>, Heidi A. Seears<sup>1</sup>, Aaron M. Reedy<sup>1,2</sup>, Tyler N. Wittman<sup>1</sup>, Christopher D. Robinson<sup>1</sup>, and Robert M. Cox<sup>1</sup>

<sup>1</sup> University of Virginia, Charlottesville, VA, USA

<sup>2</sup> DataClassroom Inc, Charlottesville, VA, USA

## Corresponding Author:

Rachana S. Bhave

Department of Biology, University of Virginia, 485 McCormick Road, PO Box 400328,

Charlottesville, VA 22904, USA

Email: [rachanabhav@gmail.com](mailto:rachanabhav@gmail.com) ; [rsb7bz@virginia.edu](mailto:rsb7bz@virginia.edu)

**Short Title:** Behavioral and genetic estimates of sexual selection in a wild population

**Keywords:** anoles, body size, parentage analysis, GT-seq, post-copulatory sexual selection

## 1 **Abstract**

2           In promiscuous species, fitness estimates obtained from genetic parentage may often  
3 reflect both pre- and post-copulatory components of sexual selection. Directly observing  
4 copulations can help isolate the role of pre-copulatory selection, but such behavioral data are  
5 difficult to obtain in the wild and may also overlook post-copulatory factors that alter the  
6 relationship between mating success and reproductive success. To overcome these limitations,  
7 we combined genetic parentage analysis with behavioral estimates of size-specific mating in a  
8 wild population of brown anole lizards (*Anolis sagrei*). Males of this species are twice as large as  
9 females and multiple mating among females is common, suggesting the scope for both pre- and  
10 post-copulatory processes to shape sexual selection on male body size. Our genetic estimates of  
11 reproductive success revealed strong positive directional selection for male size, which was also  
12 strongly associated with the number of mates inferred from parentage. In contrast, a male's size  
13 was not associated with the fecundity of his mates or his competitive fertilization success. By  
14 simultaneously tracking copulations in the wild via the transfer of colored powder to females by  
15 males from different size quartiles, we independently confirmed that large males were more  
16 likely than small males to mate. We conclude that body size is primarily under pre-copulatory  
17 sexual selection in brown anoles, and that post-copulatory processes do not substantially alter  
18 this pre-copulatory selection. Our study also illustrates the utility of combining both behavioral  
19 and genetic methods to estimate mating success to disentangle pre- and post-copulatory  
20 processes in promiscuous species.

21

22

## 23 **Introduction**

24           In species where females mate promiscuously with multiple partners, sexual selection on  
25 male traits can continue to occur after copulation, through sperm competition and female cryptic  
26 choice. These post-copulatory processes can alter the siring success of males and thereby modify  
27 the strength of sexual selection on traits linked to mating success (Parker 1970; Kvarnemo and  
28 Simmons 2013; Simmons et al. 2017; Glaudas et al. 2020). For example, larger males may mate  
29 with more females, but this may not translate into strong sexual selection if they are poor sperm  
30 competitors. In addition to pre- and post-copulatory sexual selection, the net reproductive fitness  
31 of a male is also influenced by the fecundity of his mating partners (Wong and Candolin 2005;  
32 Venner et al. 2010; Pincheira-Donoso and Hunt 2017). For any given trait, total selection due to  
33 variance in reproductive success can thus be partitioned into selection acting through variance in  
34 pre-copulatory mating success, post-copulatory fertilization success, and female fecundity  
35 (Arnold and Wade 1984; Koenig et al. 1991; Collet et al. 2012; Péliissié et al. 2014).  
36 Furthermore, selection mediated through any one of these components of fitness may be  
37 reinforced or weakened by selection acting through other components (Arnold and Wade 1984;  
38 Shuster et al. 2013). Therefore, a complete understanding of selection on a given trait requires  
39 estimating phenotypic selection as a function of total reproductive success as well as its  
40 underlying components (Arnold and Wade 1984). However, our ability to partition sexual  
41 selection in wild populations is hindered by both the cryptic nature of post-copulatory processes  
42 and the difficulty of independently measuring mating success, mate fecundity, and fertilization  
43 success (Droge-Young et al. 2012; Oneal and Knowles 2015; Marie-Orleach et al. 2016).

44           Studies of sexual selection in wild populations have typically measured fitness using  
45 either genetic estimates of parentage or behavioral observations of mating success. However,

46 either of these approaches can provide an incomplete picture of sexual selection when considered  
47 alone (Thompson et al. 2011; Marie-Orleach et al. 2016; Olsson et al. 2019), making it difficult  
48 to disentangle pre- and post-copulatory selection (Danielsson 2001; Mobley and Jones 2013;  
49 Kamath and Losos 2018; Cramer et al. 2020). Genetic parentage analysis can identify mating  
50 pairs from shared parentage, thereby providing minimum estimates of the number of mating  
51 partners for both males and females (Flanagan and Jones 2019). Such data can be used to  
52 estimate both pre-copulatory mating success (minimum number of known mates per male) and  
53 post-copulatory fertilization success (proportion of offspring sired with females who have  
54 multiple known mates) (Rose et al. 2013; Evans and Garcia-Gonzalez 2016). However, many  
55 copulations may go undetected if females mate with many partners but produce relatively few  
56 offspring, potentially leading to mis-estimation of selection via mating success. (Pemberton et al.  
57 1992; Flanagan and Jones 2019; Olsson et al. 2019; Baird and York 2021). Direct observations  
58 of copulations avoid this problem, but it is usually impossible to comprehensively track all  
59 copulations in wild populations. For example, animals may copulate in obscure or sheltered  
60 locations, the duration of mating may be short, the population density may be too low, or the  
61 population size may be too high for comprehensive observations (Candolin 1998; Dunn et al.  
62 2012; Johnson et al. 2014; Cramer et al. 2020). Therefore, reliance on either genetic or  
63 behavioral methods alone to measure fitness may lead to misestimation of the strength of pre-  
64 and post-copulatory sexual selection (Pischedda and Rice 2012; Evans and Garcia-Gonzalez  
65 2016; Baird and York 2021). Consequently, there is increasing emphasis on approaches that  
66 measure fitness and its components using a combination of both behavioral observations and  
67 genetic parentage analyses to help partition pre- and post-copulatory dimensions of sexual

68 selection (Collet et al. 2012; Pischedda and Rice 2012; Evans and Garcia-Gonzalez 2016;  
69 McDonald et al. 2017; Simmons et al. 2017; Olsson et al. 2019).

70 We studied the sexually dimorphic brown anole lizard, *Anolis sagrei*, to determine which  
71 components of male reproductive success (i.e., mating success, average mate fecundity, or  
72 competitive fertilization success) generate selection for larger body size in this species. Adult  
73 male brown anoles are, on average, two to three times larger than adult females in body mass  
74 (Cox and Calsbeek 2010a). Larger males are more likely to succeed in competitive interactions  
75 that lead to female encounters and to sire more offspring (Tokarz 1985; Kamath and Losos  
76 2018). However, female brown anoles produce offspring with multiple sires during the breeding  
77 season and can store sperm for several months (Calsbeek et al. 2007; Calsbeek and Bonneaud  
78 2008; Duryea et al. 2016; Kamath and Losos 2018; Kahrl et al. 2021). Females may also bias  
79 their offspring sex ratio based on the body size or condition of the males with which they mate,  
80 suggesting that post-copulatory processes can also shape selection on male body size (Calsbeek  
81 and Bonneaud 2008; Cox and Calsbeek 2010b; Cox et al. 2011). Although several studies have  
82 detected selection for larger body size in male brown anoles (Cox and Calsbeek 2010a; Duryea  
83 et al. 2016; Kamath and Losos 2018), no study to date has assessed the extent to which the  
84 higher reproductive success of larger males is due to higher mating success, higher average mate  
85 fecundity, higher fertilization success, or a combination of these components of reproductive  
86 success (Friesen et al. 2020).

87 Given the scope for both pre- and post-copulatory selection to act on male body size in  
88 brown anoles (Calsbeek et al. 2007; Kahrl et al. 2016), we combined genetic parentage and  
89 behavioral observations of mating to estimate fitness components in a wild population of this  
90 species. Based on the established role of body size in mediating aggressive interactions among

91 males, we hypothesized that body size is primarily subject to pre-copulatory selection (Tokarz  
92 1985; Duryea et al. 2016; Kamath and Losos 2018)  
93 Specifically, we predicted that body size would be positively associated with both total  
94 reproductive success (number of offspring sired) and mating success (number of mates identified  
95 via genetic parentage). Although anoles only lay one egg at a time, larger females produce more  
96 offspring compared to smaller females and tend to be more fecund (Andrews & Rand, 1974; Cox  
97 & Calsbeek, 2011; Duryea et al., 2016; Warner & Lovern, 2014). Thus, we also explored  
98 whether large males preferentially mate with larger and more fecund females. Since post-  
99 copulatory selection could weaken or reinforce pre-copulatory selection (Danielsson 2001;  
100 Hosken et al. 2008; Kvarnemo and Simmons 2013; Parker et al. 2013; Turnell and Shaw 2015),  
101 we also tested whether competitive fertilization success (i.e., the proportion of offspring sired  
102 with females who also produced offspring with other males) differed as a function of male body  
103 size. To corroborate our inferences based on genetic parentage with behavioral estimates of  
104 mating success, we quantified size-specific mating rates in the wild by tracking the copulatory  
105 transfer of fluorescent powders from males to females, with different colors of powder  
106 corresponding to different quartiles for male body size. We then tested whether larger males  
107 obtained a greater number of copulations, whether larger males mated with larger females, and  
108 whether female body size and fecundity were positively correlated. Our study design thus  
109 allowed us to separate the contributions of pre-copulatory mating success, female fecundity, and  
110 post-copulatory fertilization success.

111

## 112 **Methods**

### 113 *Field site and sampling*

114 We studied an island population of brown anole lizards (*Anolis sagrei*) in the Guano  
115 Tolomato Matanzas Natural Estuarine Research Reserve in northern Florida (29°37'53" N,  
116 81°12' 46" W). Adults begin mating around March (Lee et al. 1989) and females typically lay  
117 one egg every 7-14 days from April through October. Juveniles emerge between late May and  
118 November, and most do not enter the breeding population as adults until the subsequent year. To  
119 assay the reproductive success of males in the wild, we sampled all adults and juveniles of the  
120 population at four different times during the breeding season (March, May, July, and October) in  
121 2019. We marked each new individual with a unique toe clip and preserved a small (1-2 cm) tail  
122 clip in 100% ethanol at -20°C for genotyping. We measured snout-vent length (SVL, nearest 1  
123 mm) and body mass (nearest 0.01g) of all individuals prior to releasing them at their site of  
124 capture the following day. We captured and measured a total of 920 adults (hatched prior to  
125 2019) and 905 juveniles (hatched in 2019) on the island. Most of the adults were first captured as  
126 hatchlings in their year of birth and genotyped during previous sampling censuses.

127

### 128 *Genotyping and parentage assignment*

129 We extracted DNA by adding 3-5 mg of tail tissue to 150 µl of 10% Chelex<sup>R</sup> resin (Bio-  
130 Rad, Inc.) with 1.4 µl of Proteinase K (20 mg/ml, Qiagen, Chatsworth, CA), incubating at 55°C  
131 for 180 min, and denaturing at 99°C for 10 min. If the DNA concentration was not within the  
132 desired range of 10-25 ng/µl, we repeated extractions and modified the above protocol by  
133 incubating new tail samples in 40 µl of 10% Chelex<sup>R</sup> resin with 1.5 µl of Proteinase K. After  
134 centrifugation at 2250 g at 4°C for 15 minutes, we collected 3 µl of supernatant from these  
135 extractions to genotype individuals using the Genotyping-in-Thousands by sequencing (GT-seq)  
136 protocol (Campbell et al. 2015) with a custom panel of primers for 215 biallelic SNP loci that

137 were previously identified from RAD-seq data (HA Sears, unpublished). For all extractions  
138 with an average DNA concentration of  $<10$  ng/ $\mu$ l ( $n = 282$  of 1319 samples), we carried out an  
139 additional purification step on the supernatant using 1.8x volume of AMPure XP beads  
140 (Beckman Coulter, Brea, CA, USA) and eluted samples in 20  $\mu$ l 1x TE (Fisher Bioreagents, Fair  
141 Lawns, NJ, USA) to concentrate the DNA to  $>10$  ng/ $\mu$ l. After extraction, we shipped DNA  
142 samples to GTseek LLC (Twin Falls, ID, USA) for library preparation, sequencing, and data  
143 processing to obtain genotypes. Briefly, all 215 loci were simultaneously amplified and tagged  
144 with Illumina priming sequences in a multiplexed polymerase chain reaction (PCR). Each  
145 sample was then tagged with well-specific and plate-specific indices in a second PCR. The PCR  
146 products were then standardized to similar concentrations, pooled, cleaned, and then sequenced  
147 on an Illumina NextSeq 550 with  $1 \times 75$  bp reads. The raw Illumina reads were checked for  
148 quality using FastQC and then de-multiplexed and assigned genotypes following Campbell et al.  
149 (2015).

150 We used SNPPIT 2.0 (Anderson 2012) to assign genetic parentage. We included all  
151 offspring known to have hatched in 2019 that were successfully genotyped at a minimum of 128  
152 loci ( $< 40\%$  missing loci;  $n = 885$  successfully genotyped of 905 total offspring). We included  
153 adults as potential parents if they were successfully genotyped at a minimum of 165 loci ( $< 23\%$   
154 missing loci). Since individuals that were present but were not captured in 2019 may have also  
155 produced offspring in that year, we included all successfully genotyped individuals captured on  
156 the island between 2015 and 2018 as potential parents ( $n = 7042$  individuals genotyped in  
157 previous studies). Of these putative parents, 870 individuals were captured as adults in 2019. We  
158 used a significance threshold of  $P < 0.05$  after correcting for the false discovery rate (FDR) to  
159 assign parentage. We successfully assigned 736 offspring (83.2% of 885 genotyped offspring) to



160 a total of 610 parents ( $n = 357$  females, 253 males). Of these 610 parents, 479 (78.5%) were  
161 among the 870 successfully genotyped adults that we captured in 2019 ( $n = 276$  females, 203  
162 males) and 131 (21.4% of 610) were only captured in previous sampling years ( $n = 81$  females,  
163 50 males). Because we did not measure body size for this subset of 50 adult males in 2019, we  
164 excluded them from our calculations of relative fitness and our analyses of sexual selection.  
165 Among the 870 successfully genotyped adults that we captured in 2019, a total of 391  
166 individuals ( $n = 213$  females, 178 males, 44.9%) were found to have zero reproductive success,  
167 since they were included in the SNPPIT analysis but were not assigned offspring.

168

### 169 *Partitioning reproductive success and measuring selection*

170 All statistical analyses were performed in R v. 4.2.1 (R Core Team 2022) using the  
171 RStudio interface (RStudio Team 2022). We conducted univariate selection analyses to test  
172 whether body size of males was a predictor of reproductive success (total number of offspring  
173 sired in 2019) and its components (i.e., mating success, average mate fecundity, and competitive  
174 fertilization success), as estimated by genetic parentage. We measured mating success as the  
175 total number of unique females with which a male sired offspring. We measured average mate  
176 fecundity as the mean number of offspring produced across all female partners of a male,  
177 including offspring sired by other males. We measured competitive fertilization success by  
178 calculating the mean proportion of offspring sired by a male with each of his partners. To detect  
179 competing males from parentage data, a female must produce at least two offspring that are  
180 assigned to at least two mates. Thus, our measure of competitive fertilization success excluded  
181 all situations in which females produced either a single offspring or multiple offspring sired by a  
182 single male (following Devigili et al. 2015). To account for the fact that the null expectation for

183 proportional fertilization success decreases with the number of additional males with which a  
184 female has mated, we used the following formula (Devigili et al. 2015):

185 
$$\text{Competitive fertilization success} = \sum_{i=1}^{i=k} \left( \frac{PS_i \cdot (n_i - 1)}{PS_i \cdot (n_i - 2) + 1} \right) / k,$$

186 where  $PS_i$  is the proportion of offspring sired for each  $i^{th}$  female with which that male mated,  
187  $k$  is the total number of females with which that male mated that had more than two mates, and  
188  $n_i$  is the total number of mates of the  $i^{th}$  female. Thus, a male that sired 33.3% of the offspring  
189 from a female that had three total mates would have a competitive fertilization success score of  
190 0.5, which would be the same as a male that sired 50% of the offspring from a female that had  
191 only two mates.

192 We estimated univariate linear ( $s$ ) and non-linear ( $c$ ) selection differentials following  
193 Lande and Arnold (1983). We standardized body mass to a mean of 0 and a standard deviation of  
194 1. We calculated relative fitness by dividing total reproductive success and each of its  
195 components (see above) by the mean value of that fitness component across all males in the  
196 population that were included in the analysis. We used ordinary least-squares regressions of each  
197 measure of relative fitness on standardized body mass to estimate univariate linear selection  
198 differentials, with separate regressions for each fitness component. To estimate  $s$ , we included  
199 only the linear term for body mass, and to estimate  $c$ , we included both the linear and quadratic  
200 terms (i.e.,  $0.5 \times \text{body mass}^2$ ) (Lande and Arnold 1983; Stinchcombe et al. 2008). We used  
201 generalized linear models to test the significance of selection estimates. We used a negative  
202 binomial distribution for all components of fitness except competitive fertilization success,  
203 which had a Gaussian distribution. Non-linear selection differentials were not significant for any  
204 fitness component, so we only present visualizations of linear selection differentials. We  
205 considered individuals with zero reproductive success to have zero mating success, whereas the

206 remaining fitness components were considered inestimable. This approach assumes that failure  
207 to reproduce is due to failure to mate when it could, in principle, also reflect low mate fecundity  
208 and/or poor competitive fertilization success. To confirm that including these zero values did not  
209 bias our partitioning of selection among components of reproductive success, we repeated the  
210 above analyses using only the subset of males that had at least one offspring (Fig. S1).

211

### 212 *Assessing size-specific mating success with fluorescent powders*

213 We directly assessed the relationship between body size and copulation rates at two  
214 points in the middle of the breeding season: May 12-16 and July 26-Aug 3, 2019. In the first two  
215 days of each sampling period, we captured as many adult males on the island as possible and  
216 distributed them into size quartiles based on their body mass (May:  $n = 153$ ; July:  $n = 128$ ).  
217 Before releasing each male to its site of capture the following day, we powdered males on their  
218 venters with one of four colors of fluorescent powder corresponding to their size quartiles (A/AX  
219 Series, DayGlo Color Corp., Ohio). The four colors (orange, yellow, pink and green) were  
220 selected after pilot studies confirmed that different colors of powder transferred during  
221 successive copulations could be clearly distinguished in the event of multiple mating across  
222 different size quartiles. These powders are non-toxic, easily differentiated under ultraviolet (UV)  
223 light, and wear off after a few days without negatively affecting the fitness of animals (Holbrook  
224 et al. 1970; Rojas-Araya et al. 2020). We switched the colors assigned to each size quartile  
225 between May and July to ensure that any observed mating patterns were not due to underlying  
226 differences in our ability to detect each color. We were not blind to the size quartile associated  
227 with the colors during the study. Subsequent studies in the same population using a double-blind  
228 study design have not uncovered significant biases in estimation of copulation rates (RS Bhawe,

229 unpublished). Two days after males were released, we captured as many adult females on the  
230 island as possible in a single day in May ( $n = 132$ ) and across 5 days in July ( $n = 312$ ; 50% of  
231 these captures occurred on the first day). We noted the color of any powder on or near the cloaca  
232 under UV light. Presence of color found on any other part of the body was uncommon and  
233 treated as a non-copulation contact. We tested whether observed copulations within each size  
234 quartile (as determined by the color of transferred powder) significantly differed from null  
235 expectation using a chi-square test with 3 degrees of freedom. The expected number of  
236 copulations for each size quartile was a product of the proportion of powdered males that were  
237 assigned to each quartile and the total number of copulations detected across all females.

238 We also used data on transfer of fluorescent powder to test whether large males mated  
239 more frequently with large females, potentially benefiting males through the increased fecundity  
240 of larger females. To test this prediction, we conducted an ordinary least square regression of  
241 female body mass (continuous dependent variable) on male size quartile (ordinal independent  
242 variable) and estimated significance with a type II ANOVA using the *car* package (Fox et al.  
243 2019) in R. We tested the underlying assumption that female fecundity is positively correlated  
244 with body size by regressing the total number of offspring assigned to a female using genetic  
245 parentage (continuous response variable) on female body mass (continuous independent  
246 variable) using generalized linear models with a negative binomial error distribution and a logit  
247 link function. Because female body mass can vary depending on the presence or absence of  
248 oviductal eggs, we also repeated the above analyses by considering SVL as an alternate measure  
249 of female body size. In all cases, we conducted two separate analyses using data from May and  
250 July, followed by a third analysis on data combined across May and July.

251

252 *Comparing behavioral and genetic approaches*

253           To compare behavioral and genetic approaches, we assessed whether males belonging to  
254 larger size quartiles in our powdering experiment (behavioral) also differed in their fitness  
255 components as measured by parentage (genetic). We conducted separate generalized linear  
256 regressions for males captured in May versus July, with reproductive success (negative  
257 binomial), mating success (negative binomial), average mate fecundity (negative binomial) and  
258 competitive fertilization success (Gaussian) as response variables. We treated the size quartile  
259 that males belonged to in each month as an ordinal predictor variable. In each analysis, we only  
260 considered males that were powdered in that month and successfully genotyped. To test whether  
261 associations between size quartile and fitness components varied across months, we repeated the  
262 above analyses on data combined across May and July while also including an effect of month  
263 and its interaction with size quartile. A subset of successfully genotyped males that were  
264 captured and powdered in May were also captured and powdered in July ( $n = 37$ ), so these  
265 individuals were included twice in our combined analysis. Given that these males constituted  
266 only 15% of all individuals that were powdered, and that model results were similar with or  
267 without inclusion of these repeated measures across both months, we did not include individual  
268 ID as a random effect to simplify the model fit. We obtained effect sizes of all main effects in  
269 these models from a type II ANOVA unless the interaction of size quartile  $\times$  month was  
270 significant, in which case we conducted a type III ANOVA.

271           We carried out a chi-square test with 3 degrees of freedom to test whether the number of  
272 copulations in each size quartile, as determined by powdering (observed), corresponded to the  
273 number of copulations predicted from genetic parentage (expected). To calculate the expected  
274 proportion of copulations in each size quartile, we first estimated the number of unique dam-sire

275 pairs from genetic parentage for sires. We assumed that each parental pair indicates at least one  
276 copulation with a male belonging to a particular size quartile, then divided the total copulations  
277 assigned in each size quartile by the total number of copulations attributable to all males that  
278 were measured and powdered in either May or in July. The expected number of copulations was  
279 calculated by multiplying this proportion by the total number of copulations observed from the  
280 transfer of fluorescent powder in the respective months.

281

## 282 *Results*

### 283 *Partitioning pre- and post-copulatory selection on body size*

284 We found significant directional selection favoring large male body mass when using  
285 total reproductive success as a measure of fitness ( $s = 0.40 \pm 0.08$ ,  $\chi^2 = 22.43$ ,  $P < 0.001$ , Fig.  
286 1A), and we found similarly strong selection when using only its pre-copulatory component of  
287 mating success ( $s = 0.33 \pm 0.07$ ,  $\chi^2 = 19.36$ ,  $P < 0.001$ , Fig. 1B). Directional selection favoring  
288 large size persisted when we excluded males who did not sire any progeny from our analyses  
289 using reproductive success and mating success (Fig. S1). However, neither average mate  
290 fecundity ( $s = -0.03 \pm 0.04$ ,  $\chi^2 = 0.15$ ,  $P = 0.70$ , Fig. 1C) nor competitive fertilization success  
291 (adjusted for number of competing males) generated significant selection on male body mass ( $s =$   
292  $0.02 \pm 0.02$ ,  $F_{1,115} = 2.18$ ,  $P = 0.17$ , Fig. 1D). There was no significant quadratic (non-linear)  
293 selection on male body mass with respect to total reproductive success ( $c = 0.30 \pm 0.12$ ,  $\chi^2 =$   
294  $2.51$ ,  $P = 0.11$ ), mating success ( $c = 0.30 \pm 0.12$ ,  $\chi^2 = 2.33$ ,  $P = 0.13$ ), average mate fecundity ( $c$   
295  $= 0.19 \pm 0.09$ ,  $\chi^2 = 1.21$ ,  $P = 0.27$ ) or competitive fertilization success ( $c = -0.0009 \pm 0.02$ ,  $F_{1,115}$   
296  $= 0.001$ ,  $P = 0.97$ ).

297

298 *Behavioral estimates of size-specific mating success*

299           We powdered a total of 241 males across May and July to test whether actual copulation  
300 rates differed across male size quartiles (Fig. 2A-C). Based on detection of transferred powder  
301 (Fig. 2D), we found that 38 of 132 (28.8%) females in May and 151 of 312 (48.4%) females in  
302 July mated within the five-day collection period, with most of these copulations occurring within  
303 three days of the release of powdered males. We also found that 1 of 38 (2.6%) females in May  
304 and 10 of 151 (6.6%) females in July mated with males from more than one size quartile during  
305 that period. We omitted 2 of 39 and 5 of 161 total copulations in May and July respectively,  
306 since we could not accurately resolve the color of fluorescent powder. Omitting these instances  
307 from the analyses did not bias the number of copulations for any size quartile. Within each  
308 month, observed copulations differed significantly from our null expectation of an equal number  
309 of matings across size quartiles (May:  $\chi^2 = 8.03$ ,  $df = 3$ ,  $P = 0.045$ ,  $n = 37$  copulations, July:  $\chi^2 =$   
310  $8.33$ ,  $df = 3$ ,  $P = 0.039$ ,  $n = 156$  copulations; Fig. 2E-F). This difference was primarily  
311 attributable to the smallest size quartile having consistently fewer copulations than expected in  
312 each month. We saw a similar relationship between male size quartile and mating success after  
313 pooling data from both months ( $\chi^2 = 11.64$ ,  $df = 3$ ,  $P = 0.009$ ,  $n = 193$  copulations).

314           Although there was a weak trend towards positive size-assortative mating, female body  
315 mass did not differ significantly across male size quartiles in either May ( $F_{3,33} = 2.40$ ,  $P = 0.085$ ,  
316 Fig. 3A) or July ( $F_{1,152} = 2.12$ ,  $P = 0.10$ , Fig. 3B). However, when considering data combined  
317 across both months, we found a weak but significant positive correlation between female body  
318 mass and the size quartiles of males with which they mated (Size Quartile:  $F_{3,185} = 3.24$ ,  $P =$   
319  $0.023$ , Month:  $F_{1,185} = 3.71$ ,  $P = 0.056$ , Size Quartile x Month:  $F_{3,185} = 0.75$ ,  $P = 0.52$ ). Female  
320 SVL did not differ significantly across male size quartiles in May ( $F_{3,33} = 1.48$ ,  $P = 0.22$ , Fig.

321 3C), July ( $F_{1,152} = 2.26$ ,  $P = 0.083$ , Fig. 3D), or when combining both months (Size Quartile:  
322  $F_{3,185} = 1.48$ ,  $P = 0.22$ , Month:  $F_{1,185} = 1.23$ ,  $P = 0.27$ , Size Quartile x Month:  $F_{3,185} = 1.43$ ,  $P =$   
323 0.24). The total number of offspring produced by a female in a year tended to increase with her  
324 body mass, but this weak relationship was not significant in May ( $\chi^2 = 3.50$ ,  $P = 0.061$ ) or July  
325 ( $\chi^2 = 2.54$ ,  $P = 0.11$ ). However, when considering SVL as a measure of female size, total number  
326 of offspring had a strong positive association with female body size in May ( $\chi^2 = 9.91$ ,  $P =$   
327 0.002), though not in July ( $\chi^2 = 0.11$ ,  $P = 0.74$ ).

328

### 329 *Comparing behavioral and genetic approaches*

330 Of the 365 males that we successfully genotyped, measured, and included in genetic  
331 parentage analysis, 225 were also powdered in either May or July. Total reproductive success  
332 estimated from genetic data increased with male size quartile in May ( $\chi^2 = 39.83$ ,  $P < 0.001$ , Fig.  
333 4A), although this positive relationship was weaker and not significant in July ( $\chi^2 = 7.21$ ,  $P =$   
334 0.065, Fig. 4B). Combining data across both months confirmed a weak overall relationship  
335 between size and reproductive success (Size Quartile:  $\chi^2 = 6.93$ ,  $P = 0.074$ ), a large effect of  
336 month on reproductive success (Month:  $\chi^2 = 19.30$ ,  $P < 0.001$ ), and a significant difference  
337 between months in the relationship between size and reproductive success (Size Quartile x  
338 Month:  $\chi^2 = 14.16$ ,  $P = 0.002$ , Table 1). Likewise, we found that male mating success increased  
339 with size quartile in May ( $\chi^2 = 32.05$ ,  $P < 0.001$ , Fig. 4C), but this relationship was weaker and  
340 not significant in July ( $\chi^2 = 5.43$ ,  $P = 0.14$ , Fig. 4D). Pooling data confirmed a significant  
341 difference between months in the relationship between size and mating success (Size Quartile:  $\chi^2$   
342  $= 5.31$ ,  $P = 0.15$ , Month:  $\chi^2 = 14.12$ ,  $P = 0.002$ , Size Quartile x Month:  $\chi^2 = 10.52$ ,  $P = 0.014$ ,  
343 Table 1). Average mate fecundity was unrelated to male size quartile in May ( $\chi^2 = 4.01$ ,  $P =$



344 0.26, Fig. 4E) or July ( $\chi^2 = 6.92$ ,  $P = 0.075$ , Fig. 4F), and pooling data across months revealed a  
345 weak but significant tendency for average mate fecundity to decrease with male size (Size  
346 Quartile:  $\chi^2 = 9.39$ ,  $P = 0.025$ , Month:  $\chi^2 = 0.19$ ,  $P = 0.66$ , Size Quartile x Month:  $\chi^2 = 1.10$ ,  $P =$   
347  $0.78$ , Table 1). Competitive fertilization success was unrelated to male size in May ( $F_{3,62} = 1.34$ ,  
348  $P = 0.27$ , Fig. 4G), in July ( $F_{3,65} = 2.17$ ,  $P = 0.099$ , Fig. 4H), and when pooling data across  
349 months (Size Quartile:  $F_{3,127} = 1.73$ ,  $P = 0.17$ , Month:  $F_{1,127} = 1.87$ ,  $P = 0.35$ , Size Quartile x  
350 Month:  $F_{3,127} = 1.82$ ,  $P = 0.15$ , Table 1).

351 The size distribution of copulation rates inferred from the transfer of fluorescent powder  
352 was significantly different from the size distribution of copulation rates estimated from genetic  
353 parentage in May ( $\chi^2 = 8.35$ ,  $P = 0.039$ , Fig. 5A). In particular, males in the second size quartile  
354 had more observed copulations than expected from genetic parentage, whereas males in the  
355 smallest and largest size quartiles had fewer copulations than expected (Fig. 5A). However, our  
356 analyses for May are based on substantially fewer observed copulations ( $n = 37$ ) than our  
357 analyses for July ( $n = 156$ ), in which size-specific mating rates observed in the wild did not  
358 significantly differ from rates estimated from parentage ( $\chi^2 = 1.41$ ,  $df = 3$ ,  $P = 0.70$ , Fig. 5B).

359

## 360 Discussion

361 Pre-copulatory and post-copulatory components of sexual selection can be difficult to  
362 disentangle in wild populations, especially for promiscuous species that lack parental care or  
363 stable mating pairs. In brown anoles, which lack both, genetic parentage data revealed that 65%  
364 of females that produced 2 or more offspring (i.e., females for which multiple paternity could be  
365 detected) did so with more than one mate (mean = 1.92, range = 1-4 mates), suggesting the  
366 potential for post-copulatory processes to modulate pre-copulatory sexual selection. We detected

367 strong positive directional selection on male body size using estimates of total reproductive  
368 success from genetic parentage. Partitioning male reproductive success into its components  
369 revealed that the higher reproductive success of larger males was primarily mediated by an  
370 increase in their mating success. This result was corroborated by our behavioral assay involving  
371 the transfer of fluorescent powder from males to females during copulation, which allowed us to  
372 track copulations in the wild and revealed that larger males indeed mated more frequently. By  
373 contrast, neither average mate fecundity nor male competitive fertilization success covaried  
374 positively with male body size, suggesting that pre-copulatory sexual selection is largely  
375 responsible for the strong association between reproductive success and body size in male brown  
376 anoles. This was further confirmed by our finding that both behavioral and genetic parentage  
377 estimates of mating success were similarly distributed across different male size quartiles. Thus,  
378 despite multiple mating by females, post-copulatory processes did not significantly modify pre-  
379 copulatory sexual selection for large male body size.

380

### 381 *Body size and mating success*

382 We found that larger body mass is directly associated with greater mating success in the  
383 wild (Figs. 1B, 2E-F). This pattern is corroborated by both behavioral and genetic estimates of  
384 mating success (Figs. 2E-F, 4C-D). Consequently, larger males sired a greater number of  
385 offspring than average throughout the breeding season (Figs. 1A, 4A-B). Our findings are in line  
386 with the general consensus that there is strong pre-copulatory sexual selection on male body size  
387 in species with extreme male-biased size dimorphism (Stamps et al. 1997; Kingsolver and  
388 Pfennig 2004; Fairbairn et al. 2007; Kingsolver and Diamond 2011).

389           The observed pattern of pre-copulatory sexual selection for large body size is likely due  
390 to success in male-male competition (Andersson and Iwasa 1996; Eberhard 1996; Cox et al.  
391 2003; Roff and Fairbairn 2007; Janicke and Fromonteil 2021). Previous studies have shown that  
392 larger male anoles are more active (Jenssen et al., 2005; Tokarz, 1985), move across larger areas  
393 (Stamps et al. 1997; Kamath and Losos 2018), and are more likely to win in aggressive  
394 interactions with other males, resulting in more frequent encounters with females (Steffen and  
395 Guyer 2014). This is the case in many other species with male-biased size dimorphism or contest  
396 competition (Cox et al. 2003; Fairbairn et al. 2007; Emlen 2008; Janicke et al. 2016; Horne et al.  
397 2020). Although examples of sexual selection via female choice are relatively rare in reptiles  
398 (Olsson and Madsen 1995; Tokarz 1995; Cox and Kahr 2014; Ord et al. 2015; Rosenthal 2017),  
399 our study cannot eliminate the role of female choice for large males (Wong and Candolin 2005;  
400 Fitze et al. 2008; Karsten et al. 2009; Debelle et al. 2016). Selection due to female choice may  
401 occur directly for body size or indirectly through correlated traits such as territory quality,  
402 display behaviors, activity levels, and ornaments which signal male aggression and quality  
403 (Cooper and Vitt 1993; Censky 1997; Hamilton and Sullivan 2005; Swierk and Langkilde 2013;  
404 Flanagan and Bevier 2014; Ord et al. 2015).

405           Although genetic estimates of reproductive success and mating success were strongly  
406 correlated with body size or size quartiles measured early in the breeding season (May, Figs. 1A-  
407 B; 4A, 4C), they were not strongly correlated with size quartiles measured later in the breeding  
408 season (July, Figs. 4B, 4D; Table 1). Estimates of mating success from both behavioral and  
409 genetic measures were similarly high for males beyond the first size quartile in July (Figs. 2F;  
410 4D). This may indicate that, beyond a certain threshold, the advantage of large size in agonistic  
411 interactions with other males can saturate (Cox and Calsbeek 2010a; Reedy et al. 2017).

412

413 *Body size and average mate fecundity*

414 Male body mass was mostly unrelated to, or sometimes even negatively correlated with,  
415 the average fecundity of female partners (Figs. 1C, 4E-F; Table 1). This may reflect the fact that  
416 the relationship between female body mass and male size quartile was weak and nonsignificant  
417 within each month (Fig. 3A-B), and female mass itself was unrelated to fecundity. Although an  
418 alternative measure of female size (SVL) was significantly related to fecundity, consistent with  
419 previous work showing that larger female anoles may achieve a higher reproductive output  
420 (Warner and Lovern 2014; Duryea et al. 2016) by laying eggs more frequently (Cox and  
421 Calsbeek 2011), we did not find any association between male size quartile and female SVL  
422 (Fig. 3C-D). Thus, neither body mass nor SVL of females provided a strong intermediate linking  
423 male size to female fecundity via size-assortative mating. These findings are consistent with the  
424 general observation that size-assortative mating is rare, particularly in species with male-biased  
425 sexual size dimorphism, such as anoles (Shine et al. 2001; Hofmann and Henle 2006; Harrison  
426 2013; Rios Moura et al. 2021). When mate choice has been detected in anoles, males appear to  
427 prefer novel females rather than larger females (Tokarz 1992; Orrell and Jenssen 2002). This  
428 would be expected if males are primarily under selection to mate with a greater number of  
429 females, rather than more fecund females. In contrast, larger males often mate with larger and/or  
430 more fecund females in species with female-biased sexual size dimorphism (Verrell 1989;  
431 Olsson 1993; Whiting and Bateman 1999; Cox et al. 2005; John-Alder et al. 2009; Jiang et al.  
432 2013).

433

434 *Body size and competitive fertilization success*

435 Consistent with previous findings in brown anoles, we found that over 50% of the  
436 females having at least two genotyped offspring produced these offspring with more than one  
437 mate (Calsbeek et al. 2007; Duryea et al. 2016; Kahrl et al. 2021). Moreover, at least 6% of the  
438 females in our powdering studies mated with multiple partners within a short 2-5 day span. The  
439 actual frequency of multiple mating is likely to be much higher because our powdering method  
440 cannot detect instances of multiple mating within size quartiles, and because our ability to detect  
441 multiple paternity is limited by the relatively low number of offspring produced by females  
442 (mean = 2.06, range = 1-9 offspring). Although multiple mating by females was common, in  
443 situations where females produced offspring with multiple males, male size was unrelated to  
444 fertilization success (Figs. 1D, 4G-H, Table 1).

445 Post-copulatory processes can oppose pre-copulatory selection on a given trait if  
446 investment in corresponding fitness components is drawn from the same limited resource, or if  
447 the genetic covariance among fitness components is negative (Roff and Fairbairn 2007; Parker et  
448 al. 2013). Accordingly, inter- and intraspecific comparisons across several lineages, including  
449 reptiles, have shown that traits typically subjected to pre-copulatory selection trade-off with  
450 those under post-copulatory selection (Moczek and Nijhout 2004; Fitzpatrick et al. 2012; Dines  
451 et al. 2015; Kahrl et al. 2016; Somjee et al. 2018). On the other hand, when there is high mean  
452 and variance in resource acquisition, this association is likely to be positive since any increase in  
453 resource availability allows for more investment in both pre- and post-copulatory competition,  
454 (Saeki et al. 2014; Simmons et al. 2017). Consistent with this idea, several intra-specific studies  
455 have reported a positive correlation between targets of pre-copulatory sexual selection and  
456 ejaculate traits (*reviewed in* Mautz et al. 2013; Supriya et al. 2019). Although some studies report  
457 positive associations between standardized fertilization success and traits such as body size,

458 singing effort and/or weapon size (Preston et al. 2001; Hosken et al. 2008; Turnell and Shaw  
459 2015; House et al. 2016), others report negative associations (Danielsson 2001; Evans et al.  
460 2003; Kelly and Jennions 2011). However, our findings are consistent with those studies in  
461 which male fertilization success is unrelated to body size or ornament size (Keogh et al. 2013;  
462 Rose et al. 2013; Flanagan et al. 2014; McDonald et al. 2017). This may indicate that investment  
463 in mate acquisition does not trade off with investment in fertilization success, possibly due to the  
464 predicted low cost of producing ejaculates when these are distributed across several matings  
465 (Hayward and Gillooly 2011; Parker 2016; Kahrl et al. 2021; *but see* Kahrl and Cox 2015).

466         One caveat is that our measure of competitive fertilization success required us to exclude  
467 all instances in which a single male sired all of the offspring produced by a female, potentially  
468 excluding extremely strong or weak sperm competitors from our analysis (Fig. S2D, S3B).  
469 However, failure to account for the number of competing males in this way may result in  
470 spurious correlations. This is because the estimated proportion of offspring sired by a male will  
471 increase, regardless of the focal male's competitive ability, if females produce offspring with  
472 fewer mates (Rose et al. 2013; Devigili et al. 2015; McCullough et al. 2018). Indeed, when we  
473 used unadjusted fertilization success in brown anoles, we found significant, albeit very weak,  
474 positive selection on male body size (Fig. S3). Thus, post-copulatory selection on body size may  
475 be weaker in natural populations than previously reported by studies using unadjusted measures  
476 of male fertilization success (Preston et al. 2001; Hosken et al. 2008; Turnell and Shaw 2015;  
477 House et al. 2016). Our study suggests that, at least for body size, post-copulatory selection is  
478 negligible compared to pre-copulatory selection. It is more likely that post-copulatory selection  
479 acts primarily on male ejaculate traits, as has been demonstrated in brown anoles (Kahrl and Cox  
480 2015), and that it may operate independent of male body size (Kahrl et al. 2021).

481

482 *Comparing behavioral and genetic measures of mating success*

483         We found a close association between measures of size-specific mating success derived  
484 from genetic parentage and those inferred from copulations in the field, particularly in July (Fig.  
485 5B). This highlights the utility of fluorescent powder transfer as a relatively inexpensive and  
486 effective method for detecting copulations, particularly in natural populations, and for linking  
487 mating success to broad categories of phenotypic variance. Our findings are in line with other  
488 studies that have found behavioral proxies, such as the frequency of male-female associations in  
489 space and time, to be closely predictive of the realized mating and reproductive success of males  
490 (Kamath and Losos 2018; Olsson et al. 2019; Baird and York 2021). However, our technique is  
491 much easier to execute compared to detailed observations of individual copulations or  
492 movements, at least in our focal species. Thus, it can be used to uncover associations between  
493 mating success and categorical simplifications of continuous traits (as in this study), naturally  
494 categorical traits or groups (e.g., morphs), or experimental treatments (e.g., Wittman et al. 2022).  
495 It can also be used to uncover mating patterns of secretive or spatially dispersed species that can  
496 be difficult to observe in the wild for long hours (Gosden and Svensson 2007; Johnson et al.  
497 2014). Nonetheless, behavioral estimates of size-specific mating success based on powder  
498 transfer only corresponded closely with genetic mating success when extensive sampling of the  
499 female population was possible and when mating rate was high (Fig. 5A-B). For example, in  
500 May, we only sampled females for 1 day and the inferred mating rate was half of that seen in  
501 July, when we sampled for 5 days (Fig. 5A-B). Perhaps as a result, the relatively low number of  
502 observed copulations in May differed significantly from our expected distribution of size-  
503 specific mating success, which was likely more accurate because it was based on a much larger

504 number of inferred copulations from genetic parentage (Fig. 5A). Thus, behavioral observations  
505 or genetic parentage alone may not adequately capture fitness when populations are partially  
506 sampled or if mating is infrequent within a short sampling period.

507

## 508 **Conclusions**

509 Overall, our study confirms that large body size is associated with higher reproductive  
510 success in brown anoles, and that this is primarily due to the increased mating success of large  
511 males. Although previous work has suggested that sexually antagonistic viability selection may  
512 favor large male size and promote male-biased sexual size dimorphism in this species (Cox and  
513 Calsbeek 2010a; *but see* Cox and Calsbeek 2015), our results support a parallel body of recent  
514 work suggesting that sexual selection also strongly favors large male size (Tokarz 1985; Jenssen  
515 et al. 2005; Duryea et al. 2016; Kamath and Losos 2018). Importantly, we extend this work by  
516 specifically resolving the importance of pre-copulatory sexual selection and linking large male  
517 size to both behavioral and genetic measures of mating success. Our results further illustrate that  
518 strong pre-copulatory sexual selection and extremely male-biased sexual size dimorphism can  
519 occur even in promiscuous mating systems in which access to females cannot be monopolized  
520 and multiple paternity is common. Finally, our findings emphasize the importance of  
521 incorporating both behavioral and genetic methods in the same study to achieve a more robust  
522 understanding of the roles of pre- and post-copulatory processes in sexual selection.

523

## 524 **Funding**

525 This work was supported by funds from The Explorer's Club (Mamont Scholar Grant -  
526 2020) to R. S. B; and a U.S. National Science Foundation CAREER Award (grant number DEB-  
527 1453089) to R. M. C.



528 **Data Availability**

529 All code and data needed to reproduce the results presented in this paper will be available on  
530 Dryad Digital Repository at <https://doi.org/10.5061/dryad.c866t1gbb>

531

532 **Acknowledgements**

533 We thank D. Warner for logistical support during field collections and genotyping, T.  
534 Carlson, C. Giordano, B. Ferrer and B. Beck for assistance during field sampling and pilot  
535 studies, E. Bruns, L. Galloway and T. J. Chechi for lending DayGlo fluorescent powders, N.  
536 Campbell and GTSeek LLC for advice on genotyping and library preparation of samples, and M.  
537 Hale, P.L.H. de Mello, and D. Nondorf for their input on earlier drafts of the manuscript. This  
538 study was conducted under permits from the Guana Tolomato Matanzas National Estuarine  
539 Research Reserve and approval of the University of Virginia Animal Care and Use Committee  
540 (protocol 3896).

541

542 **References**

- 543 Anderson EC. 2012. Large-scale Parentage Inference with SNPs: an Efficient Algorithm for  
544 Statistical Confidence of Parent Pair Allocations. *Stat Appl Genet Mol Biol*. 11(5).  
545 doi:10.1515/1544-6115.1833.
- 546 Andersson M, Iwasa Y. 1996. Sexual selection. *Trends Ecol Evol*. 11(2):53–58.  
547 doi:10.1016/0169-5347(96)81042-1.
- 548 Andrews R, Rand AS. 1974. Reproductive Effort in Anoline Lizards. *Ecology*. 55(6):1317–1327.  
549 doi:10.2307/1935459.
- 550 Arnold SJ, Wade MJ. 1984. On the Measurement of Natural and Sexual Selection: Theory.  
551 *Evolution*. 38(4):709. doi:10.2307/2408383.
- 552 Baird TA, York JR. 2021. Does courtship behavior predict parentage in Collared Lizards?  
553 Influence of male social status and habitat structure. *Evol Ecol*. 35(5–6):795–808.  
554 doi:10.1007/s10682-021-10136-7.
- 555 Calsbeek R, Bonneaud C. 2008. Postcopulatory fertilization bias as a form of cryptic sexual  
556 selection. *Evolution*. 62(5):1137–1148. doi:10.1111/j.1558-5646.2008.00356.x.
- 557 Calsbeek R, Bonneaud C, Prabhu S, Manoukis N, Smith TB. 2007. Multiple paternity and sperm  
558 storage lead to increased genetic diversity in *Anolis* lizards. *Evol Ecol Res*. 9(3):495–503.
- 559 Campbell NR, Harmon SA, Narum SR. 2015. Genotyping-in-Thousands by sequencing (GT-seq):  
560 A cost effective SNP genotyping method based on custom amplicon sequencing. *Mol Ecol*  
561 *Resour*. 15(4):855–867. doi:10.1111/1755-0998.12357.
- 562 Candolin U. 1998. Reproduction under predation risk and the trade-off between current and future  
563 reproduction in the threespine stickleback. *Proc R Soc B Biol Sci*. 265(1402):1171–1175.  
564 doi:10.1098/rspb.1998.0415.
- 565 Censky EJ. 1997. Female mate choice in the non-territorial lizard *Ameiva plei* (Teiidae). *Behav*

- 566 Ecol Sociobiol. 40(4):221–225. doi:10.1007/S002650050336.
- 567 Collet J, Richardson DS, Worley K, Pizzari T. 2012. Sexual selection and the differential effect of  
568 polyandry. Proc Natl Acad Sci U S A. 109(22):8641–8645. doi:10.1073/pnas.1200219109.
- 569 Cooper WE, Vitt LJ. 1993. Female mate choice of large male broad-headed skinks. Anim Behav.  
570 45(4):683–693. doi:10.1006/anbe.1993.1083.
- 571 Cox RM, Calsbeek R. 2010a. Sex-specific selection and intraspecific variation in sexual size  
572 dimorphism. Evolution. 64(3):798–809. doi:10.1111/j.1558-5646.2009.00851.x.
- 573 Cox RM, Calsbeek R. 2010b. Cryptic Sex-Ratio Bias Provides Indirect Genetic Benefits Despite  
574 Sexual Conflict. Science (80- ). 328(5974):92–94. doi:10.1126/science.1185550.
- 575 Cox RM, Calsbeek R. 2011. An experimental test for alternative reproductive strategies  
576 underlying a female-limited polymorphism. J Evol Biol. 24(2):343–353. doi:10.1111/j.1420-  
577 9101.2010.02171.x.
- 578 Cox RM, Calsbeek R. 2015. Survival of the fattest? Indices of body condition do not predict  
579 viability in the brown anole (*Anolis sagrei*). Funct Ecol. 29(3):404–413. doi:10.1111/1365-  
580 2435.12346.
- 581 Cox RM, Duryea MC, Najarro M, Calsbeek R. 2011. Paternal condition drives progeny sex-ratio  
582 bias in a lizard that lacks parental care. Evolution. 65(1):220–230. doi:10.1111/j.1558-  
583 5646.2010.01111.x.
- 584 Cox RM, Kahrl AF. 2014. Sexual Selection and Sexual Dimorphism. In: Reproductive Biology  
585 and Phylogeny of Lizards and Tuatara. CRC Press. p. 90–120.
- 586 Cox RM, Skelly SL, John-Alder HB. 2003. A comparative test of adaptive hypotheses for sexual  
587 size dimorphism in lizards. Evolution. 57(7):1653–69. doi:10.1111/j.0014-  
588 3820.2003.tb00371.x.

- 589 Cox RM, Skelly SL, John-Alder HB. 2005. Testosterone Inhibits Growth in Juvenile Male Eastern  
590 Fence Lizards (*Sceloporus undulatus*): Implications for Energy Allocation and Sexual Size  
591 Dimorphism. *Physiol Biochem Zool.* 78(4):531–545.
- 592 Cramer ERA, Kaiser SA, Webster MS, Ryder TB. 2020. Common field data limitations can  
593 substantially bias sexual selection metrics. *Am Nat.* 196(2):180–196. doi:10.1086/709547.
- 594 Danielsson I. 2001. Antagonistic pre- and post-copulatory sexual selection on male body size in a  
595 water strider (*Gerris lacustris*). *Proc R Soc B Biol Sci.* 268(1462):77–81.  
596 doi:10.1098/rspb.2000.1332.
- 597 Debelle A, Ritchie MG, Snook RR. 2016. Sexual selection and assortative mating: an  
598 experimental test. *J Evol Biol.* 29(7):1307–1316. doi:10.1111/jeb.12855.
- 599 Devigili A, Evans JP, Di Nisio A, Pilastro A. 2015. Multivariate selection drives concordant  
600 patterns of pre- and postcopulatory sexual selection in a livebearing fish. *Nat Commun.*  
601 6(1):1–9. doi:10.1038/ncomms9291.
- 602 Dines JP, Mesnick SL, Ralls K, May-Collado L, Agnarsson I, Dean MD. 2015. A trade-off  
603 between precopulatory and postcopulatory trait investment in male cetaceans. *Evolution.*  
604 69(6):1560–1572. doi:10.1111/evo.12676.
- 605 Droge-Young EM, Manier MK, Lüpold S, Belote JM, Pitnick S. 2012. Covariance among  
606 premating, post-copulatory and viability fitness components in *Drosophila melanogaster* and  
607 their influence on paternity measurement. *J Evol Biol.* 25(8):1555–1563. doi:10.1111/j.1420-  
608 9101.2012.02540.x.
- 609 Dunn SJ, Waits LP, Byers JA. 2012. Genetic versus census estimators of the opportunity for  
610 sexual selection in the wild. *Am Nat.* 179(4):451–462. doi:10.1086/664626.
- 611 Duryea MC, Bergeron P, Clare-Salzler Z, Calsbeek R. 2016. Field estimates of parentage reveal

- 612 sexually antagonistic selection on body size in a population of *Anolis* lizards. *Ecol Evol.*  
613 6(19):7024–7031. doi:10.1002/ece3.2443.
- 614 Eberhard WG. 1996. *Female Control: Sexual Selection by Cryptic Female Choice*. Princeton  
615 University Press.
- 616 Emlen DJ. 2008. The Evolution of Animal Weapons. *Annu Rev Ecol Evol Syst.* 39(1):387–413.  
617 doi:10.1146/annurev.ecolsys.39.110707.173502.
- 618 Evans JP, Garcia-Gonzalez F. 2016. The total opportunity for sexual selection and the integration  
619 of pre- and post-mating episodes of sexual selection in a complex world. *J Evol Biol.*  
620 29(12):2338–2361. doi:10.1111/jeb.12960.
- 621 Evans JP, Zane L, Francescato S, Pilastro A. 2003. Directional postcopulatory sexual selection  
622 revealed by artificial insemination. *Nature.* 421(6921):360–363. doi:10.1038/nature01367.
- 623 Fairbairn DJ, Blanckenhorn WU, Székely T. 2007. *Sex, Size and Gender Roles: Evolutionary*  
624 *Studies of Sexual Size Dimorphism*. Oxford University Press.
- 625 Fitze PS, Cote J, Martínez-Rica JP, Clobert J. 2008. Determinants of male fitness: disentangling  
626 intra- and inter-sexual selection. *J Evol Biol.* 21(1):246–55. doi:10.1111/j.1420-  
627 9101.2007.01447.x.
- 628 Fitzpatrick JL, Almbro M, Gonzalez-Voyer A, Kolm N, Simmons LW. 2012. Male Contest  
629 Competition And The Coevolution Of Weaponry And Testes In Pinnipeds. *Evolution.*  
630 66(11):3595–3604. doi:10.1111/j.1558-5646.2012.01713.x.
- 631 Flanagan SP, Bevier CR. 2014. Do Male Activity Level And Territory Quality Affect Female  
632 Association Time in The Brown Anole, *Anolis sagrei*? Zeh D, editor. *Ethology.*  
633 120(4):365–374. doi:10.1111/eth.12213.
- 634 Flanagan SP, Johnson JB, Rose E, Jones AG. 2014. Sexual selection on female ornaments in the

- 635 sex-role-reversed Gulf pipefish (*Syngnathus scovelli*). 27:2457–2467. doi:10.1111/jeb.12487.
- 636 Flanagan SP, Jones AG. 2019. The future of parentage analysis: From microsatellites to SNPs and  
637 beyond. Mol Ecol. 28(3):544–567. doi:10.1111/MEC.14988.
- 638 Friesen CR, Kahrl AF, Olsson M. 2020. Sperm competition in squamate reptiles. Philos Trans R  
639 Soc B Biol Sci. 375(1813). doi:10.1098/rstb.2020.0079.
- 640 Glaudas X, Rice SE, Clark RW, Alexander GJ. 2020. The intensity of sexual selection, body size  
641 and reproductive success in a mating system with male–male combat: is bigger better? Oikos.  
642 129(7):998–1011. doi:10.1111/OIK.07223.
- 643 Gosden TP, Svensson EI. 2007. Female sexual polymorphism and fecundity consequences of  
644 male mating harassment in the wild. PLoS One. 2(6). doi:10.1371/journal.pone.0000580.
- 645 Hamilton PS, Sullivan BK. 2005. Female mate attraction in ornate tree lizards, *Urosaurus*  
646 *ornatus*: A multivariate analysis. Anim Behav. 69(1):219–224.  
647 doi:10.1016/j.anbehav.2004.03.011.
- 648 Harrison A. 2013. Size-Assortative Pairing and Social Monogamy in a Neotropical Lizard, *Anolis*  
649 *limifrons* (Squamata: Polychrotidae). Breviora. 534(1):1. doi:10.3099/534.1.
- 650 Hayward A, Gillooly JF. 2011. The cost of sex: Quantifying energetic investment in gamete  
651 production by males and females. PLoS One. 6(1). doi:10.1371/journal.pone.0016557.
- 652 Hofmann S, Henle K. 2006. Male Reproductive Success and Intrasexual Selection in the Common  
653 Lizard Determined by DNA-microsatellites. J Herpetol. 40(1):1–6.
- 654 Holbrook FR, Steiner LF, Fujimoto MS. 1970. Mating Competitiveness of Mediterranean Fruit  
655 Flies Marked with Fluorescent Powders. J Econ Entomol. 63(2):454–455.  
656 doi:10.1093/jee/63.2.454.
- 657 Horne CR, Hirst AG, Atkinson D. 2020. Selection for increased male size predicts variation in

- 658 sexual size dimorphism among fish species. *Proc R Soc B Biol Sci.* 287(1918).  
659 doi:10.1098/rspb.2019.2640.
- 660 Hosken DJ, Taylor ML, Hoyle K, Higgins S, Wedell N. 2008. Attractive males have greater  
661 success in sperm competition. *Curr Biol.* 18(13):553–554. doi:10.1016/j.cub.2008.04.028.
- 662 House CM, Sharma MD, Okada K, Hosken DJ. 2016. Pre and Post-copulatory Selection Favor  
663 Similar Genital Phenotypes in the Male Broad Horned Beetle. *Integr Comp Biol.* 56(4):682–  
664 693. doi:10.1093/icb/icw079.
- 665 Janicke T, Fromonteil S. 2021. Sexual selection and sexual size dimorphism in animals. *Biol Lett.*  
666 17(9). doi:10.1098/rsbl.2021.0251.
- 667 Janicke T, Häderer IK, Lajeunesse MJ, Anthes N. 2016. Evolutionary Biology: Darwinian sex  
668 roles confirmed across the animal kingdom. *Sci Adv.* 2(2). doi:10.1126/sciadv.1500983.
- 669 Jenssen TA, Decourcy KR, Congdon JD. 2005. Assessment in contests of male lizards (*Anolis*  
670 *carolinensis*): How should smaller males respond when size matters? *Anim Behav.*  
671 69(6):1325–1336. doi:10.1016/j.anbehav.2004.07.023.
- 672 Jiang Y, Bolnick DI, Kirkpatrick M. 2013. Assortative mating in animals. *Am Nat.* 181(6).  
673 doi:10.1086/670160.
- 674 John-Alder HB, Cox RM, Haenel GJ, Smith LC. 2009. Hormones, performance and fitness:  
675 Natural history and endocrine experiments on a lizard (*Sceloporus undulatus*). *Integr Comp*  
676 *Biol.* 49(4):393–407. doi:10.1093/ICB/ICP060.
- 677 Johnson MA, Lopez MV, Whittle TK, Kircher BK, Dill AK, Varghese D, Wade J. 2014. The  
678 evolution of copulation frequency and the mechanisms of reproduction in male *Anolis*  
679 lizards. *Curr Zool.* 60(6):768–777. doi:10.1093/czoolo/60.6.768.
- 680 Kahrl AF, Cox CL, Cox RM. 2016. Correlated evolution between targets of pre- and

- 681 postcopulatory sexual selection across squamate reptiles. *Ecol Evol.* 6(18):6452–6459.  
682 doi:10.1002/ece3.2344.
- 683 Kahrl AF, Cox RM. 2015. Diet affects ejaculate traits in a lizard with condition-dependent  
684 fertilization success. *Behav Ecol.* 26(6):1502–1511. doi:10.1093/beheco/arv105.
- 685 Kahrl AF, Kustra MC, Reedy AM, Bhave RS, Sears HA, Warner DA, Cox RM. 2021. Selection  
686 on sperm count, but not on sperm morphology or velocity, in a wild population of anolis  
687 lizards. *Cells.* 10(9):1–5. doi:10.3390/cells10092369.
- 688 Kamath A, Losos JB. 2018. Estimating encounter rates as the first step of sexual selection in the  
689 lizard *Anolis sagrei*. *Proc R Soc B Biol Sci.* 285(1873). doi:10.1098/rspb.2017.2244.
- 690 Karsten KB, Andriamandimbarisoa LN, Fox SF, Raxworthy CJ. 2009. Sexual selection on body  
691 size and secondary sexual characters in 2 closely related, sympatric chameleons in  
692 Madagascar. *Behav Ecol.* 20(5):1079–1088. doi:10.1093/beheco/arp100.
- 693 Kelly CD, Jennions MD. 2011. Sexual selection and sperm quantity: Meta-analyses of strategic  
694 ejaculation. *Biol Rev.* 86(4):863–884. doi:10.1111/j.1469-185X.2011.00175.x.
- 695 Keogh JS, Umbers KDL, Wilson E, Stapley J, Whiting MJ. 2013. Influence of alternate  
696 reproductive tactics and pre- and postcopulatory sexual selection on paternity and offspring  
697 performance in a lizard. *Behav Ecol Sociobiol.* 67(4):629–638. doi:10.1007/s00265-013-  
698 1482-0.
- 699 Kingsolver JG, Diamond SE. 2011. Phenotypic Selection in Natural Populations: What Limits  
700 Directional Selection? *Am Nat.* 177(3):346–357. doi:10.1086/658341.
- 701 Kingsolver JG, Pfennig DW. 2004. Individual-level selection as a cause of cope’s rule of phyletic  
702 size increase. *Evolution.* 58(7):1608–1612. doi:10.1111/j.0014-3820.2004.tb01740.x.
- 703 Koenig WD, Albano SS, Dickinson JL. 1991. A comparison of methods to partition selection



- 704 acting via components of fitness: Do larger male bullfrogs have greater hatching success? *J*  
705 *Evol Biol.* 4(2):309–320. doi:10.1046/j.1420-9101.1991.4020309.x.
- 706 Kvarnemo C, Simmons LW. 2013. Polyandry as a mediator of sexual selection before and after  
707 mating. *Philos Trans R Soc B Biol Sci.* 368(1613):20120042–20120042.  
708 doi:10.1098/rstb.2012.0042.
- 709 Lande R, Arnold SJ. 1983. The measurement of selection on correlated characters. *Evolution.*  
710 37(6):1210–1226. doi:10.2307/2408842.
- 711 Lee JC, Clayton D, Eisenstein S, Perez I. 1989. The Reproductive Cycle of *Anolis sagrei* in  
712 Southern Florida. *Copeia.* 1989(4):930. doi:10.2307/1445979.
- 713 Marie-Orleach L, Janicke T, Vizoso DB, David P, Schärer L. 2016. Quantifying episodes of  
714 sexual selection: Insights from a transparent worm with fluorescent sperm. *Evolution.*  
715 70(2):314–328. doi:10.1111/evo.12861.
- 716 Mautz BS, Møller AP, Jennions MD. 2013. Do male secondary sexual characters signal ejaculate  
717 quality? A meta-analysis. *Biol Rev.* 88(3):669–682. doi:10.1111/brv.12022.
- 718 McCullough EL, Buzatto BA, Simmons LW. 2018. Population density mediates the interaction  
719 between pre- and postmating sexual selection. *Evolution.* 72(4):893–905.  
720 doi:10.1111/evo.13455.
- 721 McDonald GC, Spurgin LG, Fairfield EA, Richardson DS, Pizzari T. 2017. Pre- and  
722 postcopulatory sexual selection favor aggressive, young males in polyandrous groups of red  
723 junglefowl. *Evolution.* 71(6):1653–1669. doi:10.1111/evo.13242.
- 724 Mobley KB, Jones AG. 2013. Overcoming statistical bias to estimate genetic mating systems in  
725 open populations: A comparison of bateman’s principles between the sexes in a sex-role-  
726 reversed pipefish. *Evolution.* 67(3):646–660. doi:10.1111/j.1558-5646.2012.01819.x.

- 727 Moczek A, Nijhout H. 2004. Trade-offs during the development of primary and secondary sexual  
728 traits in a horned beetle. *Am Nat.* 163(2):184–191. doi:10.1086/381741.
- 729 Olsson M. 1993. Male preference for large females and assortative mating for body size in the  
730 sand lizard (*Lacerta agilis*). *Behav Ecol Sociobiol.* 32(5):337–341. doi:10.1007/BF00183789.
- 731 Olsson M, Madsen T. 1995. Female choice on male quantitative traits in lizards-why is it so rare?  
732 *Behav Ecol Sociobiol.* 36:179–184. doi:10.1007/BF00177794.
- 733 Olsson M, Schwartz TS, Wapstra E, Shine R. 2019. How accurately do behavioural observations  
734 predict reproductive success in free-ranging lizards? *Biol Lett.* 15(2).  
735 doi:10.1098/rsbl.2019.0030.
- 736 Oneal E, Knowles LL. 2015. Paternity analyses in wild-caught and laboratory-reared Caribbean  
737 cricket females reveal the influence of mating environment on post-copulatory sexual  
738 selection. *J Evol Biol.* 28(12):2300–2307. doi:10.1111/JEB.12754.
- 739 Ord TJ, Klomp DA, Garcia-Porta J, Hagman M. 2015. Repeated evolution of exaggerated  
740 dewlaps and other throat morphology in lizards. *J Evol Biol.* 28(11):1948–1964.  
741 doi:10.1111/jeb.12709.
- 742 Orrell KS, Jenssen TA. 2002. Male mate choice by the lizard *Anolis carolinensis*: A preference  
743 for novel females. *Anim Behav.* 63(6):1091–1102. doi:10.1006/anbe.2002.3013.
- 744 Parker GA. 1970. Sperm Competition and its evolutionary consequences in the insects. *Biol Rev.*  
745 45(4):525–567. doi:10.1111/j.1469-185x.1970.tb01176.x.
- 746 Parker GA. 2016. The evolution of expenditure on testes. *J Zool.* 298(1):3–19.  
747 doi:10.1111/jzo.12297.
- 748 Parker GA, Lessells C, Simmons LW. 2013. Sperm competition games: A general model for  
749 precopulatory male-male competition. *Evolution (N Y).* 67(1):95–109. doi:10.1111/j.1558-

- 750 5646.2012.01741.x.
- 751 Pélissié B, Jarne P, Sarda V, David P. 2014. Disentangling precopulatory and postcopulatory  
752 sexual selection in polyandrous species. *Evolution* (N Y). 68(5):1320–1331.  
753 doi:10.1111/evo.12353.
- 754 Pemberton JM, Albon SD, Guinness FE, Clutton-brock TH, Dover GA. 1992. Behavioral  
755 estimates of male mating success tested by DNA fingerprinting in a polygynous mammal.  
756 *Behav Ecol.* 3(1):66–75. doi:10.1093/BEHECO/3.1.66.
- 757 Pincheira-Donoso D, Hunt J. 2017. Fecundity selection theory: concepts and evidence. *Biol Rev.*  
758 92(1):341–356. doi:10.1111/brv.12232.
- 759 Pischedda A, Rice WR. 2012. Partitioning sexual selection into its mating success and fertilization  
760 success components. *Proc Natl Acad Sci U S A.* 109(6):2049–2053.  
761 doi:10.1073/pnas.1110841109.
- 762 Preston BT, Stevenson IR, Pemberton JM, Wilson K. 2001. Dominant rams lose out by sperm  
763 depletion. *Nature.* 409(6821):681–682. doi:10.1038/35055617.
- 764 Reedy AM, Pope BD, Kiriazis NM, Giordano CL, Sams CL, Warner DA, Cox RM. 2017. Female  
765 anoles display less but attack more quickly than males in response to territorial intrusions.  
766 *Behav Ecol.* 28(5):1323–1328. doi:10.1093/beheco/arx095.
- 767 Rios Moura R, Oliveira Gonzaga M, Silva Pinto N, Vasconcellos Neto J, Requena GS. 2021.  
768 Assortative mating in space and time: patterns and biases. van Baalen M, editor. *Ecol Lett.*  
769 24(5):1089–1102. doi:10.1111/ele.13690.
- 770 Roff DA, Fairbairn DJ. 2007. The evolution of trade-offs: Where are we? *J Evol Biol.* 20(2):433–  
771 447. doi:10.1111/j.1420-9101.2006.01255.x.
- 772 Rojas-Araya D, Alto BW, Burkett-Cadena ND, Cummings DA. 2020. Impacts of fluorescent

- 773 powders on survival of different age cohorts, blood-feeding success, and tethered flight speed  
774 of *Aedes aegypti* (Diptera: Culicidae) females. *Acta Trop.* 207:105491.  
775 doi:10.1016/j.actatropica.2020.105491.
- 776 Rose E, Paczolt KA, Jones AG. 2013. The contributions of premating and postmating selection  
777 episodes to total selection in sex-role-reversed gulf pipefish. *Am Nat.* 182(3):410–420.  
778 doi:10.1086/671233.
- 779 Rosenthal GG. 2017. *Mate Choice. The Evolution of Sexual Decision Making from Microbes to*  
780 *Humans.* Princet Univ Press.
- 781 Saeki Y, Tuda M, Crowley PH. 2014. Allocation tradeoffs and life histories: A conceptual and  
782 graphical framework. *Oikos.* 123(7):786–793. doi:10.1111/oik.00956.
- 783 Shine R, O’connor D, Lemaster MP, Mason RT. 2001. Pick on someone your own size:  
784 Ontogenetic shifts in mate choice by male garter snakes result in size-assortative mating.  
785 *Anim Behav.* 61(6):1133–1141. doi:10.1006/anbe.2001.1712.
- 786 Shuster SM, Briggs WR, Dennis PA. 2013. How multiple mating by females affects sexual  
787 selection. *Philos Trans R Soc B Biol Sci.* 368(1613). doi:10.1098/rstb.2012.0046.
- 788 Simmons LW, Lüpold S, Fitzpatrick JL. 2017. Evolutionary Trade-Off between Secondary Sexual  
789 Traits and Ejaculates. *Trends Ecol Evol.* 32(12):964–976. doi:10.1016/j.tree.2017.09.011.
- 790 Somjee U, Miller CW, Tataric NJ, Simmons LW. 2018. Experimental manipulation reveals a  
791 trade-off between weapons and testes. *J Evol Biol.* 31(1):57–65. doi:10.1111/jeb.13193.
- 792 Stamps JA, Losos JB, Andrews RM. 1997. A comparative study of population density and sexual  
793 size dimorphism in lizards. *Am Nat.* 149(1):64–90. doi:10.1086/285979.
- 794 Steffen JE, Guyer CC. 2014. Display behaviour and dewlap colour as predictors of contest success  
795 in brown anoles. *Biol J Linn Soc.* 111(3):646–655. doi:10.1111/bij.12229.

- 796 Stinchcombe JR, Agrawal AF, Hohenlohe PA, Arnold SJ, Blows MW. 2008. Estimating non-  
797 linear selection gradients using quadratic regression coefficients: Double or nothing?  
798 Evolution. 62(9):2435–2440. doi:10.1111/j.1558-5646.2008.00449.x.
- 799 Supriya K, Price TD, Rowe M. 2019. Resource variation generates positive correlations between  
800 pre- and postcopulatory sexual traits. Behav Ecol. 30(2):341–347.  
801 doi:10.1093/beheco/ary170.
- 802 Swierk L, Langkilde T. 2013. Sizing-up the Competition: Factors Modulating Male Display  
803 Behavior During Mate Competition. Ethology. 119(11):948–959. doi:10.1111/eth.12139.
- 804 Thompson DJ, Hassall C, Lowe CD, Watts PC. 2011. Field estimates of reproductive success in a  
805 model insect: Behavioural surrogates are poor predictors of fitness. Ecol Lett. 14(9):905–913.  
806 doi:10.1111/j.1461-0248.2011.01655.x.
- 807 Tokarz RR. 1985. Body size as a factor determining dominance in staged agonistic encounters  
808 between male brown anoles (*Anolis sagrei*). Anim Behav. 33(3):746–753.  
809 doi:10.1016/S0003-3472(85)80006-3.
- 810 Tokarz RR. 1992. Male mating preference for unfamiliar females in the lizard, *Anolis sagrei*.  
811 Anim Behav. 44(5):843–849. doi:10.1016/S0003-3472(05)80580-9.
- 812 Tokarz RR. 1995. Mate choice in lizards: a review. Herpetol Monogr. 9:17–40.  
813 doi:10.2307/1466994.
- 814 Turnell BR, Shaw KL. 2015. High opportunity for postcopulatory sexual selection under field  
815 conditions. Evolution. 69(8):2094–2104. doi:10.1111/evo.12721.
- 816 Venner S, Bernstein C, Dray S, Belknap Venner M. 2010. Make Love Not War: When Should Less  
817 Competitive Males Choose Low-Quality but Defendable Females? Am Nat. 175(6):650–  
818 661. doi:10.1086/652432.

- 819 Verrell PA. 1989. Male mate choice for fecund females in a plethodontid salamander. *Anim*  
820 *Behav.* 38(6):1086–1088. doi:10.1016/S0003-3472(89)80150-2.
- 821 Warner DA, Lovern MB. 2014. The maternal environment affects offspring viability via an  
822 indirect effect of yolk investment on offspring size. *Physiol Biochem Zool.* 87(2):276–287.  
823 doi:10.1086/674454.
- 824 Whiting MJ, Bateman PW. 1999. Male preference for large females in the lizard *Platysaurus*  
825 *broadleyi*. *J Herpetol.* 33(2):309–312. doi:10.2307/1565730.
- 826 Wittman TN, Carlson TA, Robinson CD, Bhave RS, Cox RM. 2022. Experimental removal of  
827 nematode parasites increases growth, sprint speed, and mating success in brown anole  
828 lizards. *J Exp Zool Part A Ecol Integr Physiol.* 337(8):852–866. doi:10.1002/JEZ.2644.
- 829 Wong BBM, Candolin U. 2005. How is female mate choice affected by male competition? *Biol*  
830 *Rev.* 80(4):559–571. doi:10.1017/S1464793105006809.
- 831  
832

833 **Figure legends**

834

835 **Fig. 1:** Linear selection on adult body mass as a function of different components of male fitness,  
836 including relative measures of (A) reproductive success (total number of offspring), (B) mating  
837 success (total number of mates), (C) average mate fecundity (mean fecundity across all mates),  
838 and (D) competitive fertilization success (mean proportion of offspring sired across all mates,  
839 adjusted for the number of competing males). For each fitness component estimated from genetic  
840 parentage, we divided individual fitness by the population mean to obtain relative measures.  
841 Adult body mass was measured at the start of the breeding season in March and standardized to a  
842 mean of 0 and standard deviation of 1. Trendlines with 95% confidence intervals (CI) from linear  
843 regressions are used to visualize linear selection. Solid lines and asterisks in panels A-B indicate  
844 significant selection differentials while dotted lines in panels C-D indicate non-significant  
845 selection differentials (\*\*\*)  $P < 0.001$ .

846

847 **Fig. 2:** Procedure for detecting copulations in the wild. (A) Males were dusted with one of four  
848 colors of fluorescent powder based on size quartiles for body mass in (B) May, and (C) July,  
849 with colors alternated among size classes between months. Boxplots in B and C depict medians  
850 (lines), interquartile ranges (boxes), and minimum and maximum values (whiskers), with the  
851 number of males in each quartile shown above each boxplot. After males were released and  
852 allowed to interact freely with females for two days, females were captured and (D) inspected  
853 under UV light for the presence and color of any powder transferred near their cloaca. The  
854 proportions of total copulations detected among females that we correctly attributed to males  
855 from each size category are shown separately for (E) May, and (F) July. The number of females  
856 with each color of powder is indicated within each bar. The dotted lines give the expected

857 proportion of copulations in each size quartile if mating is random with respect to male size.

858 Colors of bars and box plots indicate the color of powder used for that size quartile.

859

860 **Fig. 3:** Tests for size-assortative mating with respect to (A-B) body mass or (C-D) snout-vent  
861 length (SVL) of females that mated with males from each size quartile in May (left panels) and  
862 in July (right panels), based on the color of fluorescent powder detected on the female. Small  
863 filled circles (light grey) are individual values and larger overlaid symbols are mean  $\pm$  SD values  
864 for each quartile. Mating was not strongly size assortative in either May (left) or in July (right),  
865 as shown by *F* statistics from a type II ANOVA.

866

867 **Fig. 4:** Distribution of (A-B) reproductive success (total number of offspring), (C-D) mating  
868 success (total number of mates), (E-F) average mate fecundity (mean fecundity across all mates),  
869 and (G-H) competitive fertilization success (mean proportion of offspring sired across all mates,  
870 adjusted for the number of competing males), for males powdered in May (left panels) and July  
871 (right panels) as a function of their corresponding size quartile. Fitness components were  
872 determined using genetic parentage analysis. Small symbols are individual values and larger  
873 overlaid symbols are mean  $\pm$  SD values for each quartile. Large males had significantly higher  
874 reproductive success and mating success than small males in May, but not in July. Average mate  
875 fecundity and competitive fertilization success did not differ as a function of size quartile in May  
876 or in July.

877

878 **Fig. 5:** Comparison between behavioral and genetic estimates of male mating success in (A)  
879 May and (B) July. Bars represent the proportion of copulations observed for males in each size



880 quartile based on transfer of powder, and dotted black lines indicate the expected proportion of  
881 copulations in each size quartile based on the number of mates inferred from genetic parentage  
882 data for the same males. Numbers (n) indicate the total number of copulations observed in each  
883 size quartile. The observed number of copulations based on powder transfer differed  
884 significantly from the expected number based on genetic parentage in May, but not in July.  
885  
886

887 **Tables**

888 **Table 1:** Summary of coefficient estimates from generalized linear regressions, carried out  
 889 separately for each measure of fitness as a function of size quartile (ordinal), month (categorical),  
 890 and their interaction as predictors, when pooling data from May and July: reproductive success  
 891 (total number of offspring), mating success (total number of mates), average mate fecundity  
 892 (mean fecundity across all mates), and competitive fertilization success (mean proportion of  
 893 offspring sired across all mates, adjusted for the number of competing males).

|                               | <b>Reproductive success</b>           | <b>Mating success</b>                 | <b>Average mate fecundity</b>         | <b>Competitive fertilization success</b> |
|-------------------------------|---------------------------------------|---------------------------------------|---------------------------------------|------------------------------------------|
| <i>Coefficient</i>            | <i>Incidence Rate Ratios (95% CI)</i> | <i>Incidence Rate Ratios (95% CI)</i> | <i>Incidence Rate Ratios (95% CI)</i> | $\beta$<br><i>(95% CI)</i>               |
| Intercept                     | 2.87 ***<br>(2.38 – 3.47)             | 1.92 ***<br>(1.63 – 2.25)             | 2.76<br>(2.51 – 3.03)                 | 0.51 ***<br>(0.48 – 0.54)                |
| Size Quartile (Linear - L)    | 1.56 *<br>(1.06 – 2.30)               | 1.44*<br>(1.04 – 2.00)                | 0.81*<br>(0.67 – 0.98)                | 0.04<br>(-0.02 – 0.09)                   |
| Size Quartile (Quadratic - Q) | 0.75<br>(0.52 – 1.10)                 | 0.90<br>(0.65 – 1.23)                 | 1.12<br>(0.93 – 1.35)                 | -0.06 *<br>(-0.11 – -0.005)              |
| Size Quartile (Cubic - C)     | 1.02<br>(0.71 – 1.47)                 | 0.96<br>(0.70 – 1.30)                 | 1.00<br>(0.83 – 1.21)                 | -0.01<br>(-0.06 – 0.05)                  |
| Month [May]                   | 0.54 ***<br>(0.41 – 0.71)             | 0.63 ***<br>(0.50 – 0.80)             | 0.95<br>(0.82 – 1.10)                 | -0.02<br>(-0.06 – 0.02)                  |
| Size (L) x Month              | 1.64<br>(0.95 – 2.85)                 | 1.45<br>(0.91 – 2.34)                 | 1.09<br>(0.83 – 1.44)                 | -0.00<br>(-0.08 – 0.08)                  |
| Size (Q) x Month              | 2.20 ***<br>(1.27 – 3.82)             | 1.64*<br>(1.01 – 2.65)                | 1.12<br>(0.83 – 1.50)                 | 0.09 *<br>(0.01 – 0.17)                  |
| Size (C) x Month              | 1.47<br>(0.85 – 2.56)                 | 1.46<br>(0.90 – 2.37)                 | 0.98<br>(0.72 – 1.34)                 | 0.02<br>(-0.06 – 0.10)                   |
| n                             | 262                                   | 262                                   | 176                                   | 135                                      |
| R <sup>2</sup>                | 0.279                                 | 0.225                                 | 0.090                                 | 0.081 / 0.030                            |

Estimates indicate the relative increase (Incident Rate Ratio > 1 or  $\beta > 0$ ) or decrease (Incident Rate Ratio < 1 or  $\beta < 0$ ) with an increase in size quartile for each predictor variable.

Terms are significant if the 95% confidence intervals indicated in brackets do not overlap Incident Rate Ratios at 1 or  $\beta$  at 0 (\*\*\*)  $P < 0.001$ ; (\*)  $P < 0.05$ )

895 **Figures**

896 **Fig 1.**

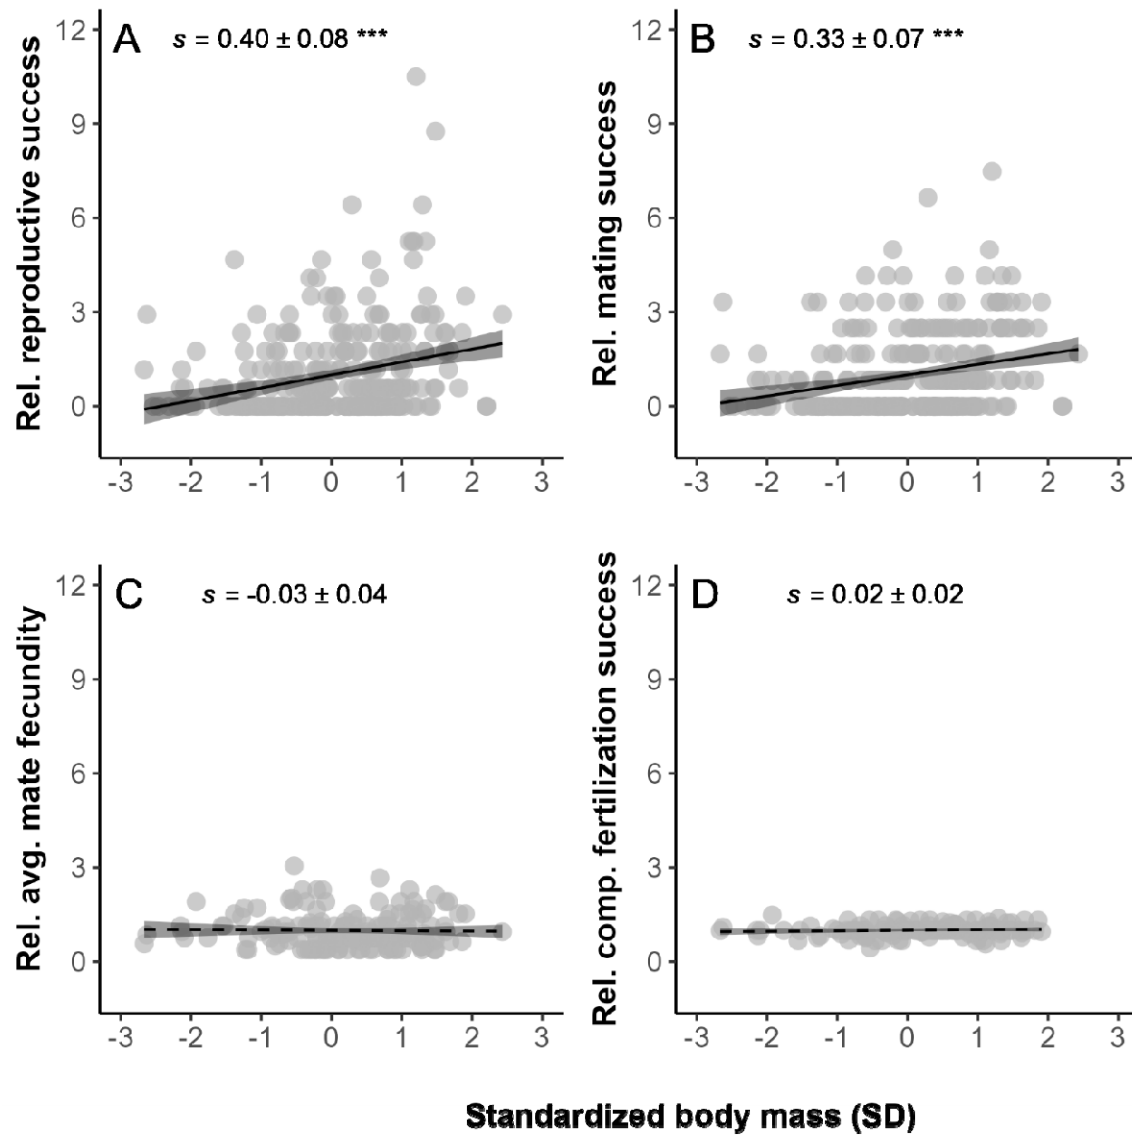

897

**Fig 2.**

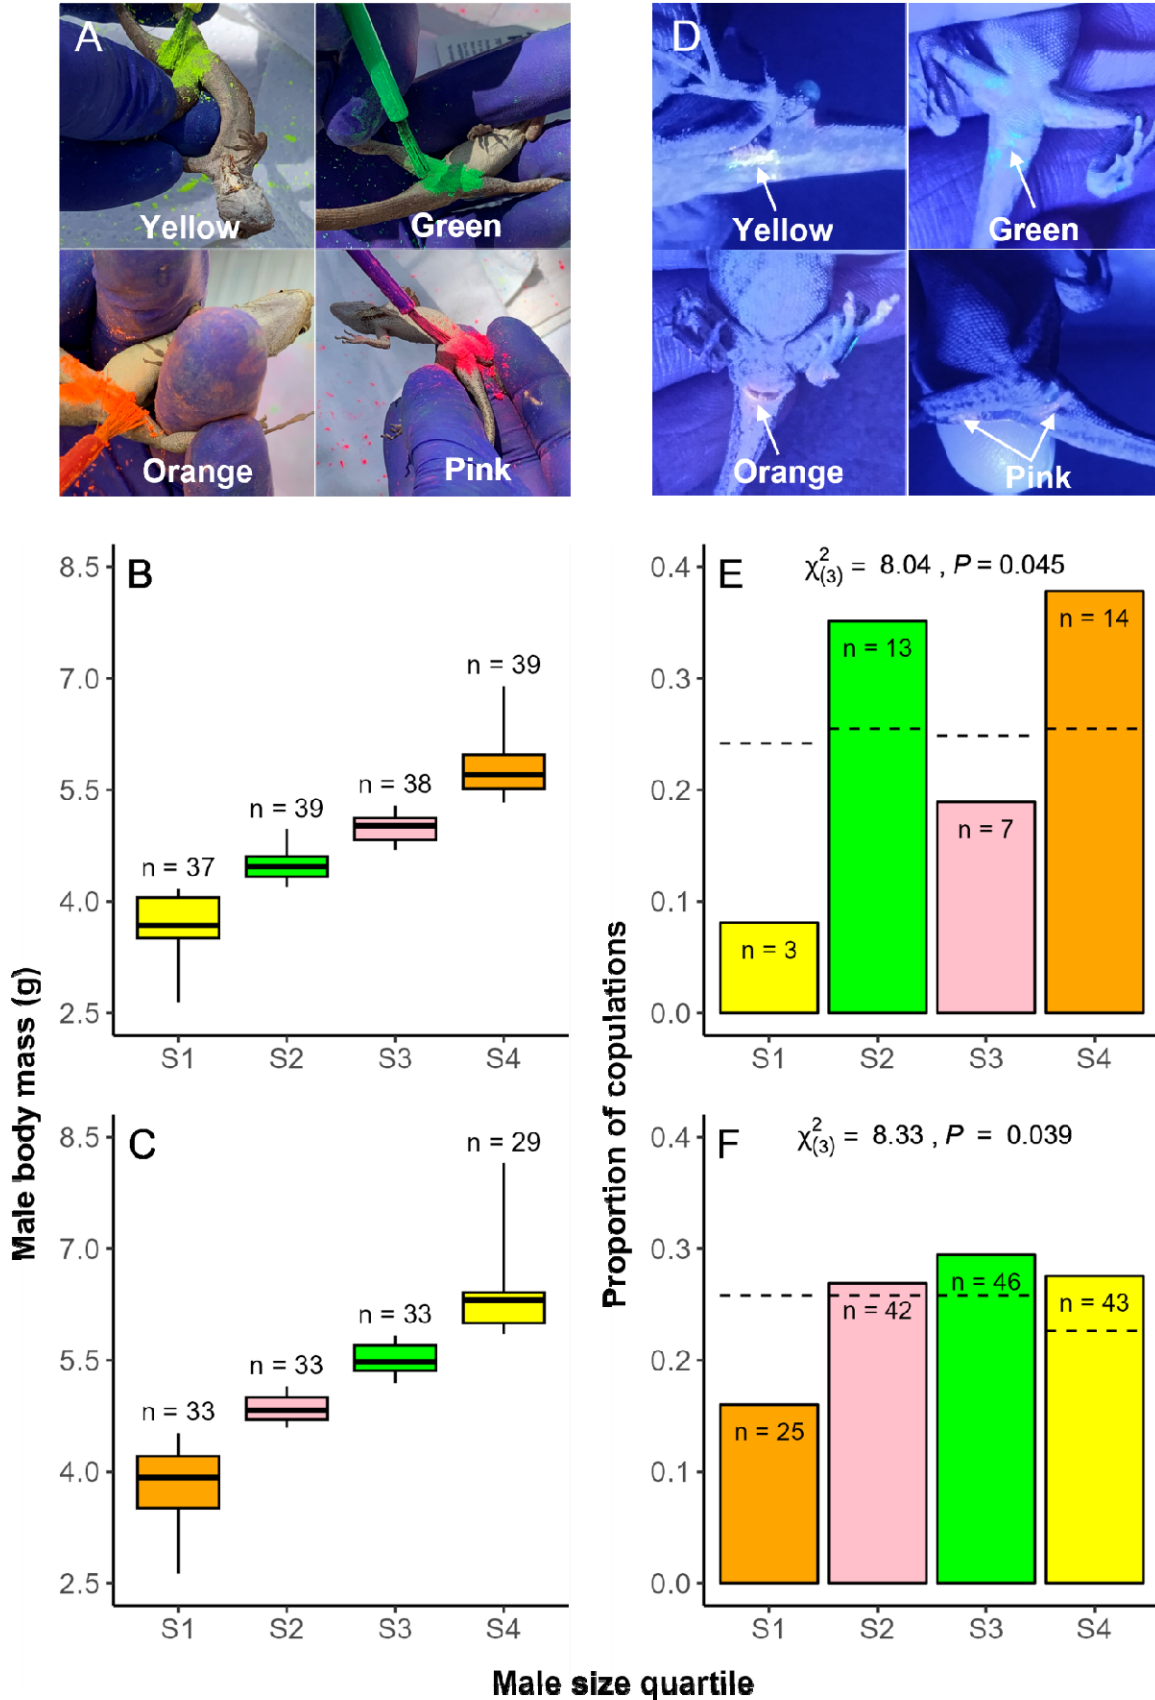

899 **Fig 3.**

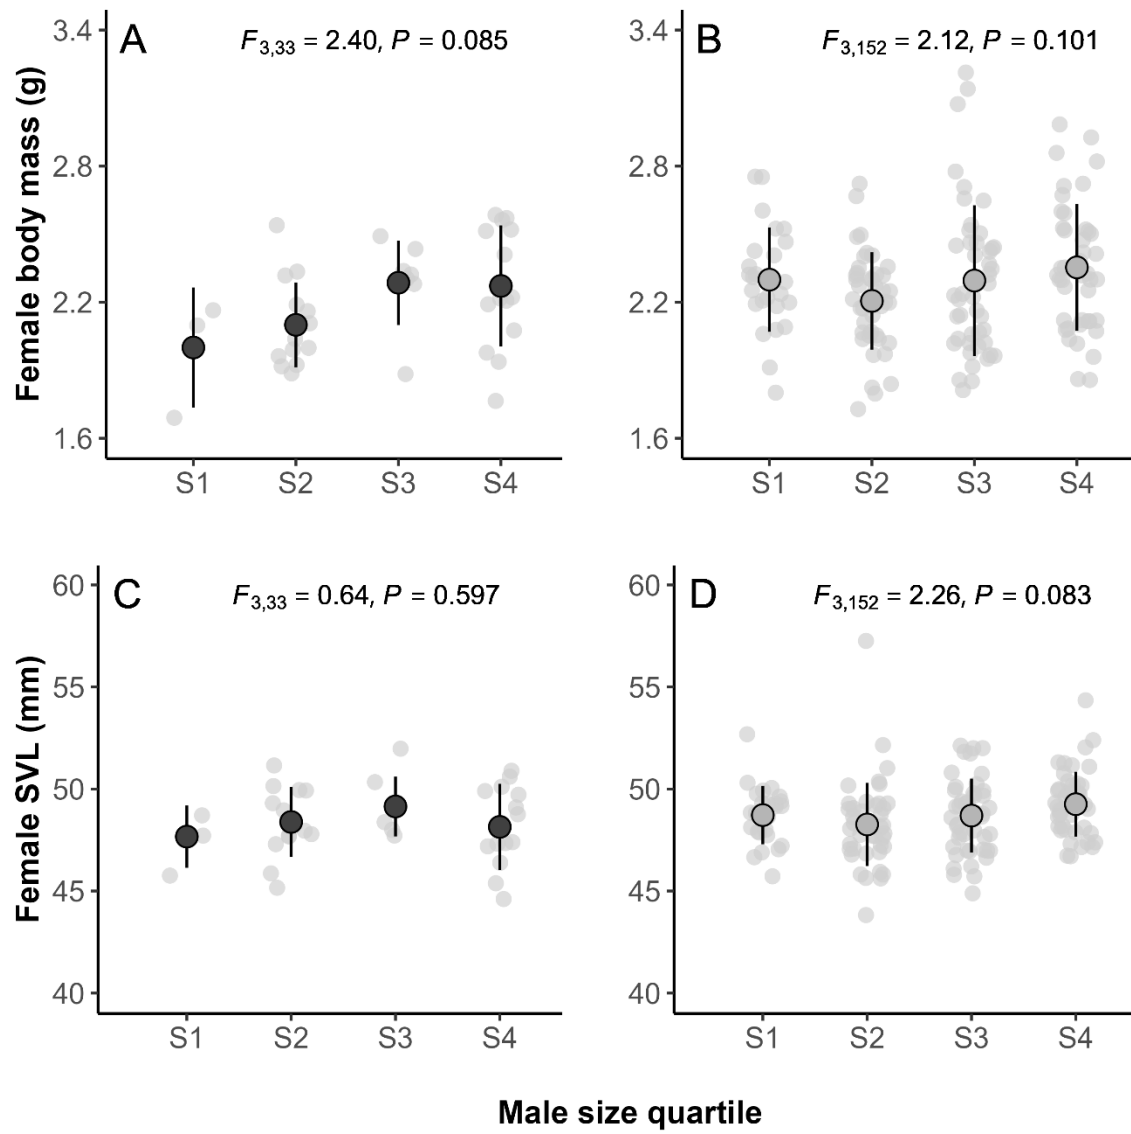

900

901

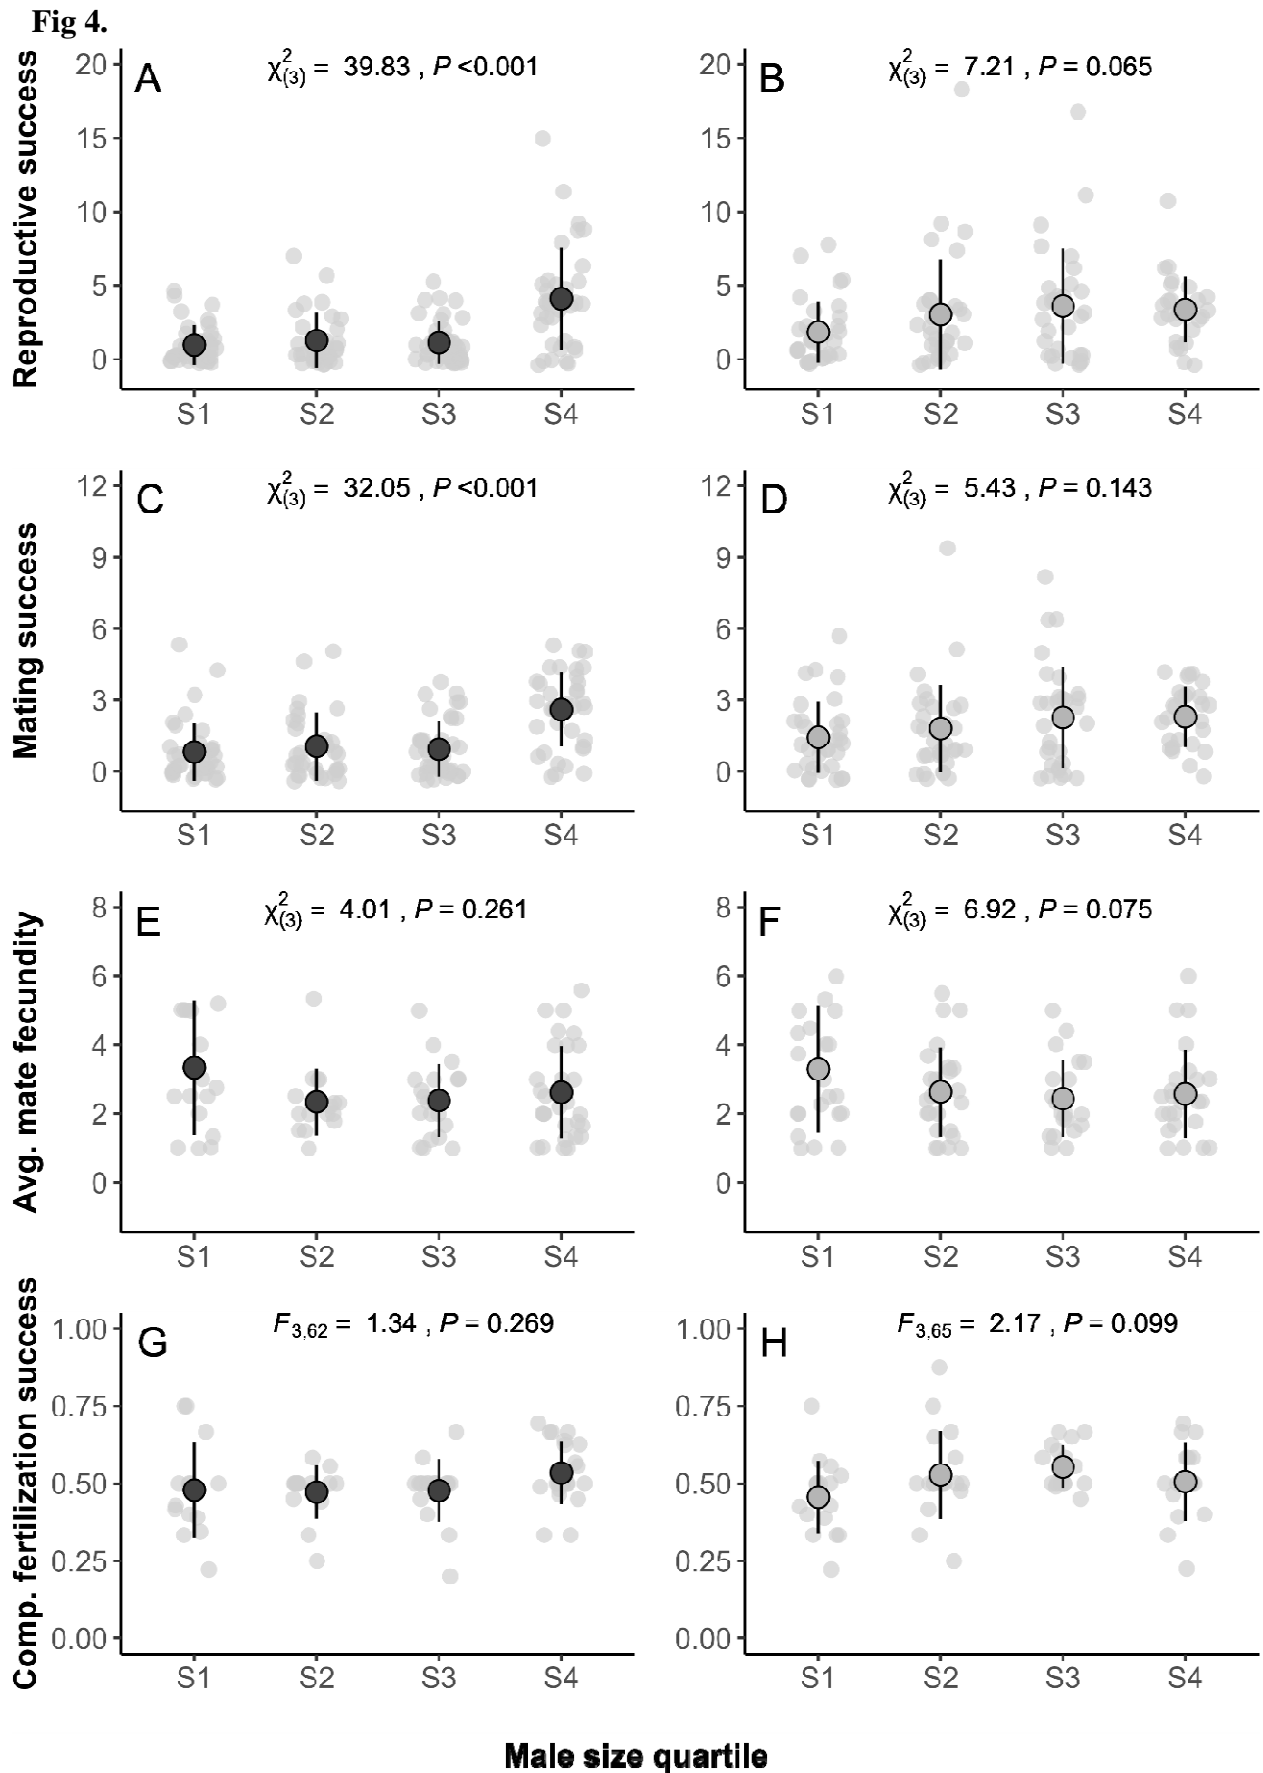

903 **Fig 5.**

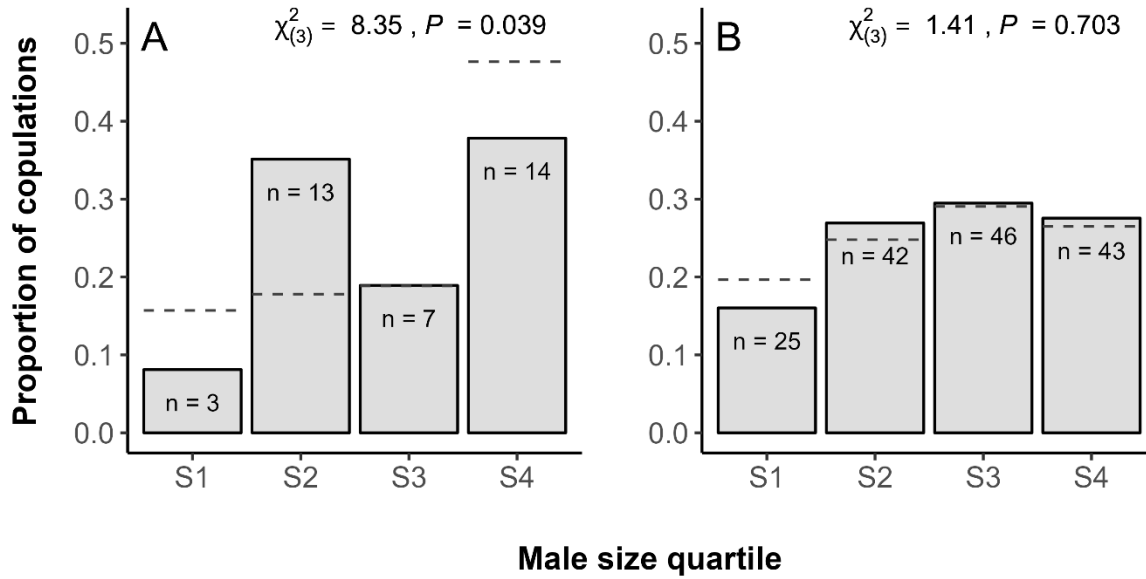

904

905

906

907 **Supplementary Figures**

908

909 **Fig. S1** Linear selection on standardized adult body mass as a function of different components  
910 of male fitness, including relative measures of (A) reproductive success (total number of  
911 offspring), (B) mating success (total number of mates), (C) average mate fecundity (mean  
912 fecundity across all mates), and (D) competitive fertilization success (mean proportion of  
913 offspring sired across all mates, adjusted for the number of competing males). Here, individuals  
914 that were not assigned offspring in parentage analysis have been excluded from all regressions to  
915 avoid inflating the relative contribution of mating success to total reproductive success by  
916 assuming that these males failed to mate. Trendlines (with 95% CI) from linear regressions are  
917 used to visualize selection. Solid lines and asterisks in panels A-B indicate significant selection  
918 differentials ( $s$ ) while the dotted lines indicate non-significant selection differentials (\*\*  $P <$   
919  $0.01$ ; \*  $P < 0.05$ ). Excluding males without any assigned progeny reduces the overall strength of  
920 selection on size by 50% (from  $s = 0.40$  to  $0.20$ , compare with Figs. 1 or S3), but only slightly  
921 reduces the proportion of that selection attributable to variance in mating success (from  $s = 0.33$   
922 or 82.5% to  $s = 0.13$  or 65%, compare with Figs. 1 or S2).

923



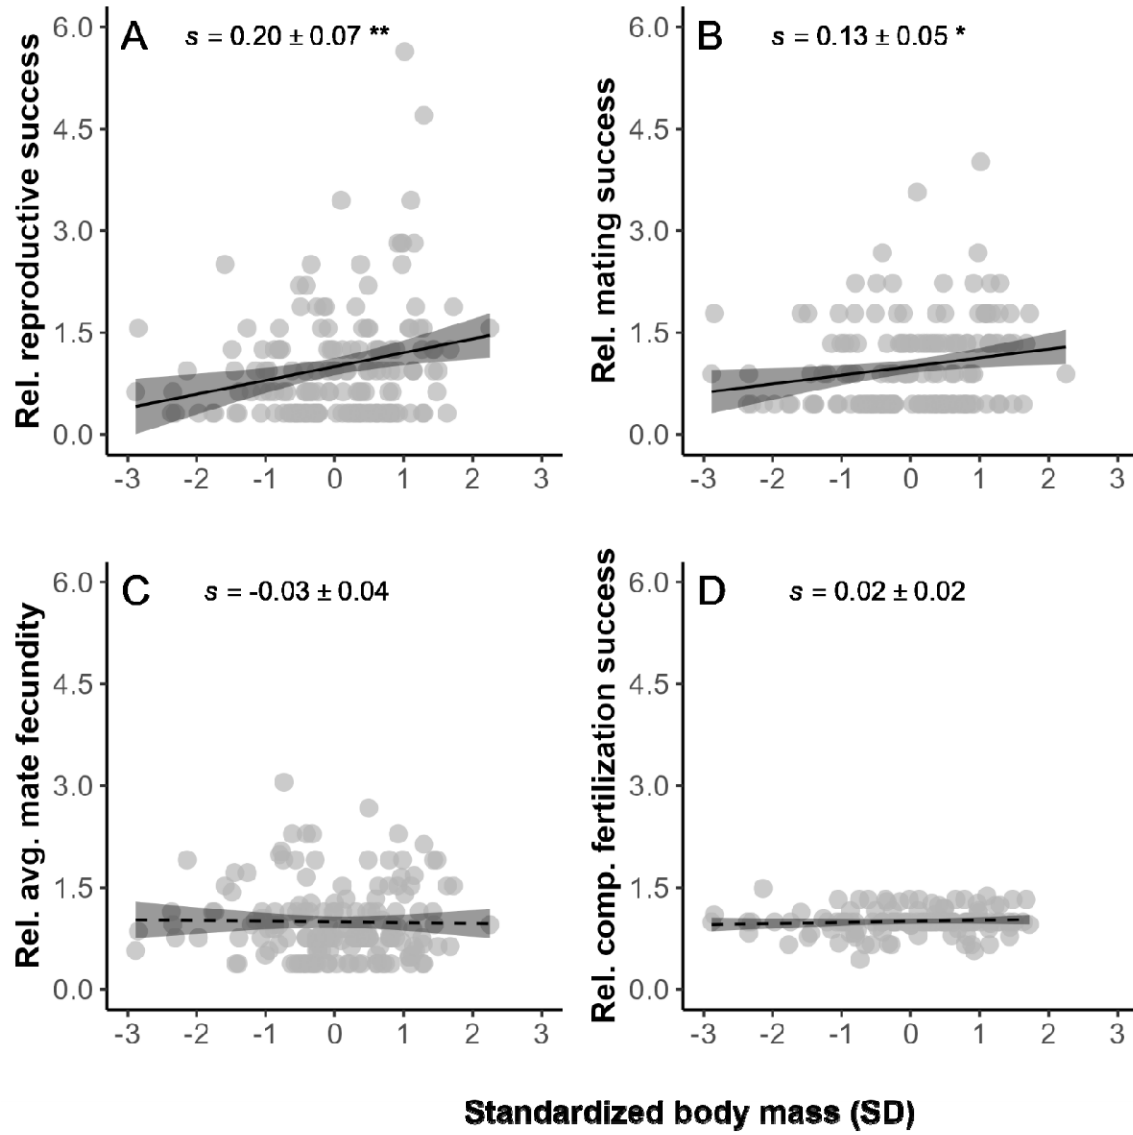

924

925

926

927 **Fig. S2** Linear selection on standardized adult body mass as a function of different components  
928 of male fitness, including relative measures of (A) reproductive success (total number of  
929 offspring), (B) mating success (total number of mates), (C) average mate fecundity (mean  
930 fecundity across all mates), and (D) competitive fertilization success (mean proportion of  
931 offspring sired across all mates, adjusted for the number of competing males). Here, the y-axis  
932 has been scaled to include only the range of data points for each fitness component to clearly  
933 visualize the selection differentials estimated in Fig 1. Trendlines (with 95% CI) from linear  
934 regressions are used to visualize selection. Solid lines and asterisks in plots A-B indicate  
935 significant selection differentials ( $*** P < 0.001$ ) while the dotted lines indicate non-significant  
936 selection differentials ( $P > 0.05$ ).

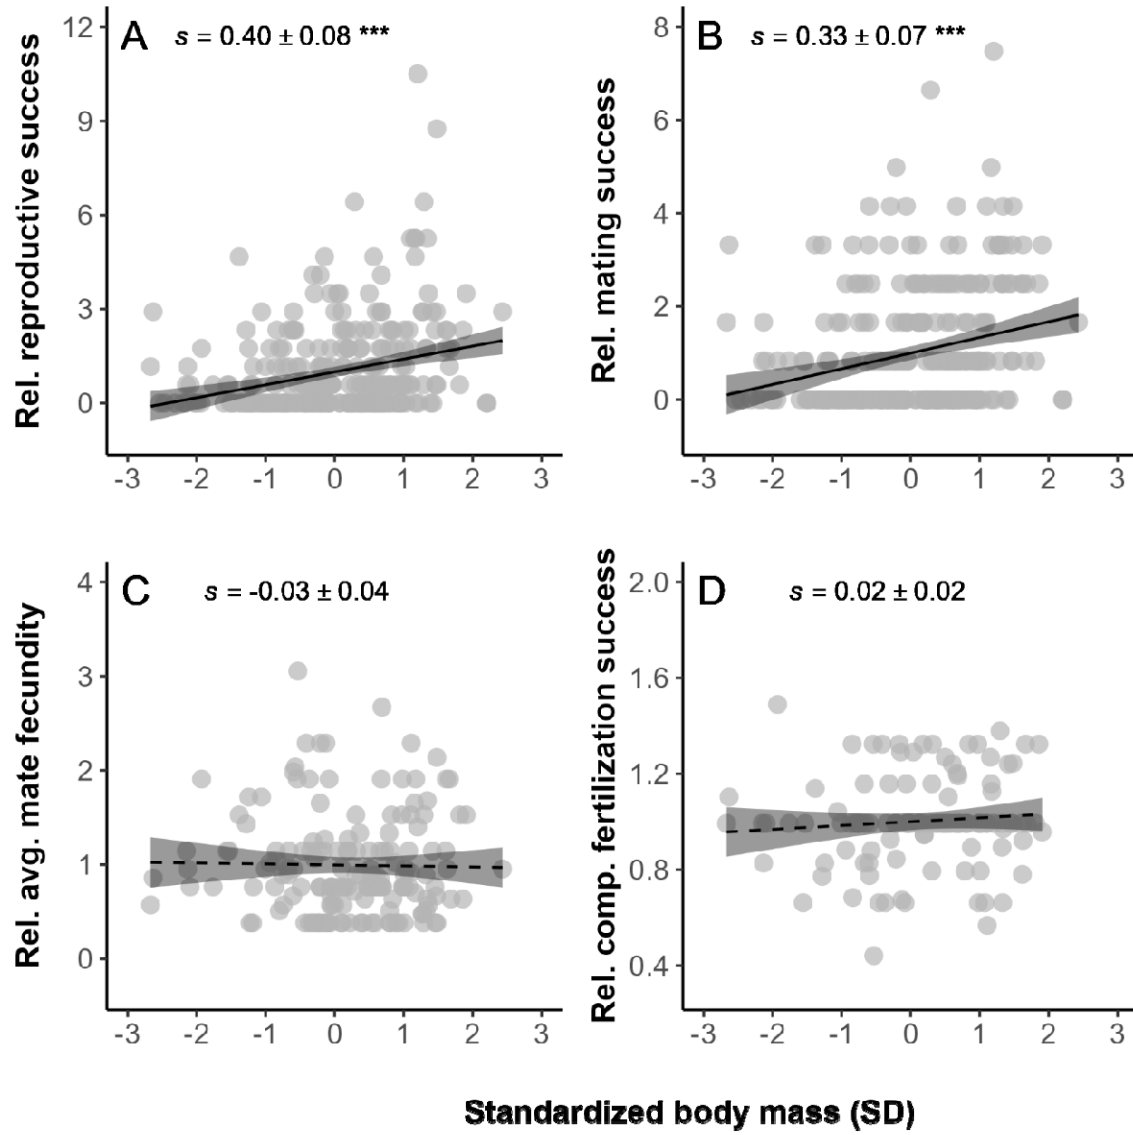

937

938

939 **Fig. S3** Linear selection on standardized adult body mass as a function of relative siring success  
940 of males (not adjusted for competitor males) (A) along the same scale as the y-axis in Fig 1 or  
941 (B) with y-axis scaled to include only the range of data points for the fitness component to  
942 clearly visualize the same selection differential. Trendlines (with 95% CI) from linear  
943 regressions are used to visualize selection. Solid lines and asterisks indicate significant selection  
944 differentials (\*  $P < 0.05$ ). Selection due to unadjusted measures of fertilization success on male  
945 body mass was significant and three times stronger than that due to competitive fertilization  
946 success (from  $s = 0.02$  to  $0.07$ , compare with Figs. 1D or S2D)

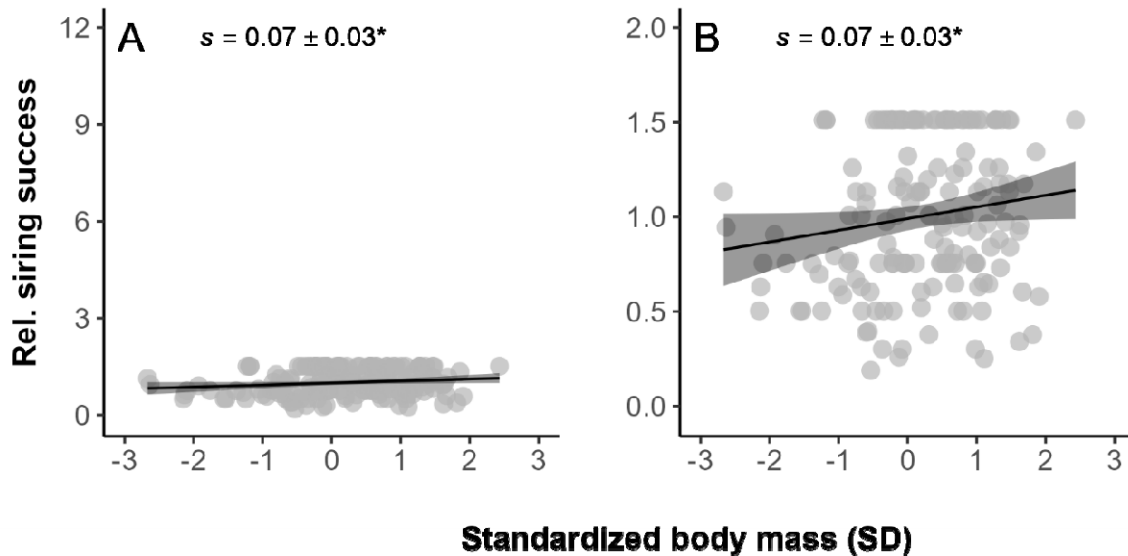

947

948
